1 **Contrasting parental roles shape sex differences in poison frog space use but not**  
2 **navigational performance**

3  
4 Andrius Pašukonis<sup>1,2,\*</sup>, Shirley Jennifer Serrano-Rojas<sup>2, 3</sup>, Marie-Therese Fischer<sup>2</sup>,  
5 Matthias-Claudio Loretto<sup>4,5</sup>, Daniel A. Shaykevich<sup>2</sup>, Bibiana Rojas<sup>6,7</sup>, Max Ringler<sup>8,9,10,11</sup>,  
6 Alexandre-Benoit Roland<sup>12</sup>, Alejandro Marcillo-Lara<sup>13, 14</sup>, Eva Ringler<sup>8,15</sup>, Camilo Rodríguez<sup>10</sup>,  
7 Luis A. Coloma<sup>14</sup>, Lauren A. O’Connell<sup>2,\*</sup>

8  
9 \*Authors for correspondence: andrius.pasukonis@cefe.cnrs.fr, loconnel@stanford.edu

10  
11 <sup>1</sup> CEFE, Univ Montpellier, CNRS, EPHE, IRD, Montpellier, France  
12 <sup>2</sup> Department of Biology, Stanford University, 371 Jane Stanford Way, Stanford, CA 94305, US  
13 <sup>3</sup> Universidad Nacional de San Antonio Abad del Cusco (UNSAAC), Cusco 08000, Peru  
14 <sup>4</sup> Technical University of Munich, TUM School of Life Sciences, Ecosystem Dynamics and Forest  
15 Management, Hans-Carl-von-Carlowitz-Platz 2, 85354 Freising, Germany  
16 <sup>5</sup> Berchtesgaden National Park, Doktorberg 6, 83471 Berchtesgaden, Germany  
17 <sup>6</sup> Department of Interdisciplinary Life Sciences, Konrad Lorenz Institute of Ethology, University of  
18 Veterinary Medicine Vienna, Savoyenstraße 1, 1160, Vienna, Austria  
19 <sup>7</sup> University of Jyväskylä, Department of Biology and Environmental Science, P.O. Box 35, 40014,  
20 Jyväskylä, Finland  
21 <sup>8</sup> Division of Behavioral Ecology, Institute of Ecology and Evolution, University of Bern, CH-3032  
22 Hinterkappelen, Switzerland  
23 <sup>9</sup> Institute of Electronic Music and Acoustics, University of Music and Performing Arts Graz, A-8010,  
24 Graz, Austria  
25 <sup>10</sup> Department of Behavioral and Cognitive Biology, University of Vienna, A-1030 Vienna, Austria  
26 <sup>11</sup> Department of Evolutionary Biology, University of Vienna, A-1030 Vienna, Austria  
27 <sup>12</sup> Research Center on Animal Cognition, Center for Integrative Biology, CNRS - Paul Sabatier  
28 University, Toulouse, France  
29 <sup>13</sup> Department of Integrative Biology, Oklahoma State University, 501 Life Sciences West, Stillwater  
30 74078, USA.  
31 <sup>14</sup> Centro Jambatu de Investigación y Conservación de Anfibios, San Rafael, Quito, Ecuador  
32 <sup>15</sup> Messerli Research Institute, University of Veterinary Medicine Vienna, Austria

33  
34 **Keywords:** adaptive specialization hypothesis, testosterone spillover, spatial ability, homing,  
35 home range, amphibians, poison frogs

36 **Short title:** Sex differences in poison frog spatial behavior

37

## 38 **Abstract**

39 Sex differences in vertebrate spatial abilities are typically interpreted under the adaptive  
40 specialization hypothesis, which posits that male reproductive success is linked to larger home  
41 ranges and better navigational skills. The androgen spillover hypothesis counters that enhanced  
42 male spatial performance may be a byproduct of higher androgen levels. Animal groups that  
43 include species where females are expected to outperform males based on life-history traits are  
44 key for disentangling these hypotheses. We investigated the association between sex differences  
45 in reproductive strategies, spatial behavior, and androgen levels in three species of poison frogs.  
46 We tracked individuals in natural environments to show that contrasting parental sex roles shape  
47 sex differences in space use, where the sex performing parental duties shows wider-ranging  
48 movements. We then translocated frogs from their home areas to test their navigational  
49 performance and found that the caring sex outperformed the non-caring sex only in one out of  
50 three species. In addition, males across species displayed more explorative behavior than females.  
51 Furthermore, androgen levels correlated with explorative behavior and homing accuracy. Our  
52 findings suggest that poison frog reproductive strategies shape space use patterns but not  
53 navigational performance, providing counterevidence to the prevailing view of adaptive sex  
54 differences in spatial abilities.

55

## 56 **Résumé (français)**

57 Chez les vertébrés, les différences de capacités spatiales entre les sexes des sont généralement  
58 interprétées selon l'hypothèse de la “spécialisation adaptative”, selon laquelle le succès reproductif  
59 des mâles serait lié à l'utilisation d'un territoire plus étendu leur procurant de meilleures aptitudes  
60 à la navigation. Cependant, une hypothèse du “débordement androgénique” propose que  
61 l'amélioration des performances spatiales des mâles puisse être en fait, un sous-produit de niveaux  
62 d'androgènes plus élevés. Pour différencier ces hypothèses, il semble donc nécessaire d'utiliser des  
63 groupes d'animaux pour lesquels il existe des espèces dont les femelles seraient plus performantes  
64 que les mâles en raison de leur écologie. Ainsi nous avons étudié les différences entre les sexes et  
65 leur interaction avec les stratégies de reproduction, le comportement spatial et les niveaux  
66 d'androgènes, chez trois espèces de grenouilles dendrobatoidés *sensu lato*. Nous avons donc suivi  
67 des individus dans leurs environnements naturels, et montré que les rôles parentaux déterminent  
68 les différences sexuelles dans l'utilisation de l'espace, le sexe en charge des fonctions parentales se  
69 déplaçant sur de plus grandes distances. Nous avons ensuite déplacé les grenouilles de leur site  
70 d'origine afin de tester leurs performances navigationnelles et nous avons constaté que le sexe en

71 charge des soins parentaux surpasse le sexe qui ne prodigue pas de soins chez une seule des trois  
72 espèces. De plus, chez les trois espèces, les mâles ont montré un comportement exploratoire  
73 supérieur à celui des femelles. Enfin, les niveaux d'androgènes sont corrélés au comportement  
74 exploratoire et à la précision de la trajectoire. Nos résultats suggèrent donc que les stratégies de  
75 reproduction des grenouilles dendrobatoidés influencent l'utilisation de l'espace mais pas les  
76 performances de navigation, en contraction avec l'hypothèse dominante sur les différences  
77 adaptatives entre les sexes dans les capacités spatiales.

78

### 79 **Resumen (español)**

80 Las diferencias en las habilidades espaciales de machos y hembras en especies de vertebrados se  
81 han interpretado comúnmente bajo la hipótesis de la “especialización adaptativa”, la cual sugiere  
82 que el éxito reproductivo de los machos está ligado a ámbitos hogareños más extensos y a mejores  
83 habilidades de navegación. Por otra parte, la hipótesis de la “sobreproducción de andrógenos”  
84 propone que un mejor desempeño espacial en los machos podría ser un subproducto de niveles de  
85 andrógenos más altos. Estudios que involucren grupos de animales con especies en las que se  
86 espera que las hembras superen el desempeño de los machos con base en ciertos rasgos de la  
87 historia de vida son cruciales para poder discernir entre estas dos hipótesis. En este estudio  
88 investigamos la asociación entre las diferencias en estrategias reproductivas de machos y hembras,  
89 el comportamiento espacial, y los niveles de andrógenos en tres especies de ranas venenosas.  
90 Seguimos individuos en su ambiente natural para mostrar que los roles contrastantes de machos y  
91 hembras en cuanto al comportamiento de cuidado parental moldean las diferencias en uso del  
92 espacio entre los sexos, de forma que el sexo encargado de llevar a cabo el cuidado parental  
93 presenta movimiento en un rango mucho más amplio. Luego, translocamos ranas a lugares fuera  
94 de su ámbito hogareño para investigar su desempeño de navegación y encontramos que el sexo  
95 encargado del cuidado parental superó el desempeño del sexo opuesto únicamente en una de las  
96 tres especies estudiadas. Adicionalmente, los machos de las tres especies tuvieron un  
97 comportamiento exploratorio más marcado que las hembras. Asimismo, encontramos que los  
98 niveles de andrógenos se correlacionan con el comportamiento exploratorio y con la precisión para  
99 regresar al hogar. Nuestros hallazgos sugieren que las estrategias reproductivas de las ranas  
100 venenosas moldean los patrones de uso del espacio pero no el desempeño de navegación,  
101 proporcionando  
102

## 103 **Introduction**

104 Sex differences in spatial abilities are well established in mammals, where males tend to have  
105 larger home ranges and enhanced navigational skill compared to females (Clint et al., 2012; Gray  
106 & Buffery, 1971; Jonasson, 2005; Jones et al., 2003). In a series of comparative studies, sex  
107 differences in space use have been linked to reproductive strategy, where polygamous rodents  
108 show sex differences in home range size and spatial abilities, but monogamous species do not  
109 (Galea et al., 1994; Gaulin et al., 1990; Gaulin & FitzGerald, 1986; Gaulin & Fitzgerald, 1989;  
110 Sawrey et al., 1994). Furthermore, across many human ethnic groups, men tend to score higher on  
111 spatial tests related to 3D mental rotations, whereas women tend to score better on object location  
112 memory (Eals & Silverman, 1994; Silverman et al., 2007; reviewed in Clint et al., 2012; Jones et  
113 al., 2003). The adaptive specialization hypothesis has been widely used to interpret these sex  
114 differences by arguing that enhanced spatial abilities in males are an adaptive trait linked to fitness,  
115 where males with better navigational skills and larger home ranges may have increased  
116 reproductive success (Gaulin & FitzGerald, 1986; Gaulin & Fitzgerald, 1989; Jones et al., 2003).  
117 In addition, maternal care in mammals may limit space use and exploration in females (Barnett &  
118 McEwan, 1973; Sherry & Hampson, 1997; Trivers, 1972). With few exceptions (Costa et al., 2011;  
119 Guigueno et al., 2014; Perry & Garland Jr, 2002; Sherry et al., 1993), empirical support for  
120 adaptive sex differences in spatial abilities is based on research in mammals, where males typically  
121 have larger home ranges than females (but see Mabry et al., 2013; Mysterud et al., 2001; Ofstad  
122 et al., 2016). Taxonomically diverse study systems are needed to test the adaptive specialization  
123 hypothesis and its broader implications for the evolution of vertebrate spatial cognition.

124  
125 Clint et al. (2012) challenged the widely accepted adaptive explanations of sex differences. They  
126 countered that sex differences in spatial behavior might be a byproduct of sex differences in  
127 androgens rather than an adaptation based on reproductive strategies (i.e., the androgen spill-over  
128 hypothesis). Higher androgen levels in mammals enhance spatial performance through effects on  
129 neural development and plasticity (Dawson et al., 1975; Galea et al., 1995; Isgor & Sengelaub,  
130 1998; Joseph et al., 1978; Neave et al., 1999; Roof & Havens, 1992; Schulz & Korz, 2010; Sherry  
131 & Hampson, 1997; Stewart et al., 1975; van Goozen et al., 1995; Williams et al., 1990). In humans,  
132 female performance in spatial ability tasks correlates positively with androgen levels and improves  
133 with androgen treatments (Aleman et al., 2004; Burkitt et al., 2007; Driscoll et al., 2005). From an

134 adaptationist perspective, this relationship has been viewed as the proximate mechanism for the  
135 selection on males' spatial abilities. However, Clint et al. (2012) argued that better spatial abilities  
136 in males might be a byproduct of sex differences in androgens unrelated to selective pressures on  
137 spatial behavior and reproductive success. As mammals have limited diversity in reproductive  
138 strategies, we lack comparisons with species where females, which have lower androgen levels,  
139 have larger home ranges and are expected to have better spatial abilities than males. To disentangle  
140 the effect of androgens and life-history traits on sex differences in spatial behavior, we need  
141 comparative research in groups of animals where either males or females among closely related  
142 species have more complex spatial behavior.

143  
144 Fish and amphibians show a remarkable variety of mating strategies and parental sex roles  
145 compared to mammals and birds, including widespread polyandry and male uniparental care  
146 (Duellman, 1989; Gross & Sargent, 1985; Helfman et al., 2009; Schulte et al., 2020; Wells, 1977;  
147 Zamudio et al., 2016). Such behavioral diversity provides natural comparison groups to test  
148 alternative hypotheses about sex differences in spatial abilities. In Neotropical poison frogs  
149 (Dendrobatoidea), male and female uniparental care, biparental care, and flexible parental sex roles  
150 occur among closely related species (Schulte et al., 2020; Summers & Tumulty, 2014; Weygoldt,  
151 1987). Poison frog parental care involves complex spatial behavior, where parents navigate the  
152 rainforest to transport tadpoles from terrestrial clutches to pools of water (Beck et al., 2017;  
153 Pašukonis et al., 2019; E. Ringler et al., 2013). Poison frogs show well-developed spatial cognition  
154 and rely on spatial memory to relocate home territories and tadpole deposition sites (Beck et al.,  
155 2017; Liu et al., 2016, 2019; Pašukonis et al., 2014, 2016; Stynoski, 2009). Male tadpole transport  
156 is the ancestral and most common form of parental care in poison frogs (Carvajal-Castro et al.,  
157 2021; Summers & Tumulty, 2014; Weygoldt, 1987), but female transport and flexible parental  
158 roles have evolved in some species (E. K. Fischer & O'Connell, 2020; E. Ringler, Pašukonis, et  
159 al., 2015). In species where females perform parental care, frogs place their tadpoles in small,  
160 resource-poor nurseries. Females frequently return to these pools to supplement the tadpoles' diet  
161 by provisioning with unfertilized eggs (Brust, 1990; Summers & Tumulty, 2014). All these  
162 parental behaviors require well-developed spatial memory and navigation abilities. Therefore  
163 individuals with better spatial memory may have increased reproductive fitness, leading to  
164 enhanced spatial abilities in the sex that performs parental care, as proposed by the adaptive

165 specialization hypothesis. Poison frogs also show sex-typical differences in androgen levels, where  
166 males have higher androgen levels than females, although androgen levels decrease during tadpole  
167 transport in males (E. K. Fischer & O’Connell, 2020). Androgens are also elevated in response to  
168 territorial intrusions in males, suggesting that androgens are regulated in these amphibians  
169 similarly to other vertebrate taxa (Rodríguez et al., 2022). Thus, comparative studies in poison  
170 frogs provide a unique opportunity to understand how parental roles and reproductive strategies  
171 shape sex differences in space use and navigational abilities, and how hormones regulate these  
172 behaviors.

173  
174 Here we report extensive field studies on sex differences in spatial behavior across three poison  
175 frog species with contrasting parental sex roles and reproductive strategies: the Brilliant-Thighed  
176 Poison Frog *Allobates femoralis*, an inconspicuous frog with flexible but predominantly male  
177 parental care, the Dyeing Poison Frog *Dendrobates tinctorius*, an aposematic frog with obligate  
178 male care, and the Diablito Poison Frog *Oophaga sylvatica*, an aposematic species with obligate  
179 female care. We tracked frogs with miniature tags to quantify sex differences in home range and  
180 parental care-associated space in their natural environment. We then quantified the sex differences  
181 in navigational performance by experimentally translocating frogs from their home areas and  
182 tracking their homing behavior. We also used noninvasive methods to measure androgen levels  
183 before and after translocation. Based on the adaptive specialization hypothesis, we predicted that  
184 the tadpole transporting sex (males in *D. tinctorius* and *A. femoralis*, females in *O. sylvatica*) would  
185 have wider-ranging space use and better navigational performance. Following the androgen  
186 spillover hypothesis, we predicted that males would show enhanced navigation regardless of  
187 species differences in reproductive strategy.

188

## 189 **Results**

### 190 *Sex differences in parental roles predict sex differences in space use*

191 We first quantified the sex differences in space use and the association between movements and  
192 parental behavior across three species that differ in parental sex roles (Figure 1). In *A. femoralis*,  
193 where males do most parental care duties, the average male home range was 153 % larger and  
194 movement extent 172 % larger than females (Table 1 and S1, Fig. 1). The same pattern was  
195 reflected in long-term movements based on capture-recapture data (Annex 1). In *O. sylvatica*,



196 where females perform parental care, the average male home range was 56 % smaller and  
197 movement extent 57 % times smaller than females (Fig. 1, Table 1 and S1). The same pattern was  
198 reflected in movement extent based on short-term tracking at a different study site (Annex 1). In  
199 *D. tinctorius*, where males perform parental care, we found no significant sex differences in home  
200 range size or movement extent (Fig. 1, Table 1 and S1) based on tracking data, but males showed  
201 wider-ranging long-term movements based on capture-recapture data (Annex 1, Fig. S2). Sex  
202 influenced the average daily travel of *A. femoralis*, where the best-fit model included sex, behavior,  
203 daytime temperature, and random factors, but not in *D. tinctorius* and *O. sylvatica*. *Allobates*  
204 *femoralis* males moved more on days of parental care than on mating days (lsm contrast:  $\beta = 1.8$ ,  
205  $P < 0.001$ ) and other days (lsm contrast:  $\beta = 1.9$ ,  $P < 0.001$ ), but equally between mating days and  
206 other days (lsm contrast  $P = 0.75$ ; Fig. 1). *Allobates femoralis* females moved more on days of  
207 mating than other days (lsm contrast:  $\beta = 0.6$ ,  $P < 0.001$ ) and were only observed transporting  
208 tadpoles once (Fig. 1). *Dendrobates tinctorius* males also moved more on days of parental care  
209 than on mating days (lsm contrast:  $\beta = 1.3$ ,  $P < 0.001$ ) and other days (lsm contrast:  $\beta = 1.5$ ,  $P <$   
210  $0.001$ ), but moved equally between mating days and other days (lsm contrast  $P = 0.85$ , Fig. 1).  
211 Daily travel of *D. tinctorius* females did not differ on days of mating from other days (lsm contrast  
212  $P = 0.4$ , Fig. 1), and females were never observed in the pools or with tadpoles. Daily travel of *O.*  
213 *sylvatica* males did not differ between mating days and other days (lsm contrast  $P = 0.95$ , Fig. 1)  
214 and males were never seen transporting tadpoles, but were regularly found near the breeding pools  
215 often located inside their territories. Females of *O. sylvatica* moved more on days of parental care  
216 than on other days (lsm contrast:  $\beta = 0.4$ ,  $P = 0.004$ ; Fig. 1), but there was no difference between  
217 mating days and parental days (lsm contrast  $P = 0.8$ ) or other days (lsm contrast  $P = 0.3$ ). In  
218 summary, we found sex differences in space use that reflect sex differences in parental roles across  
219 species, and that parental care is associated with the longest movements in all three species.

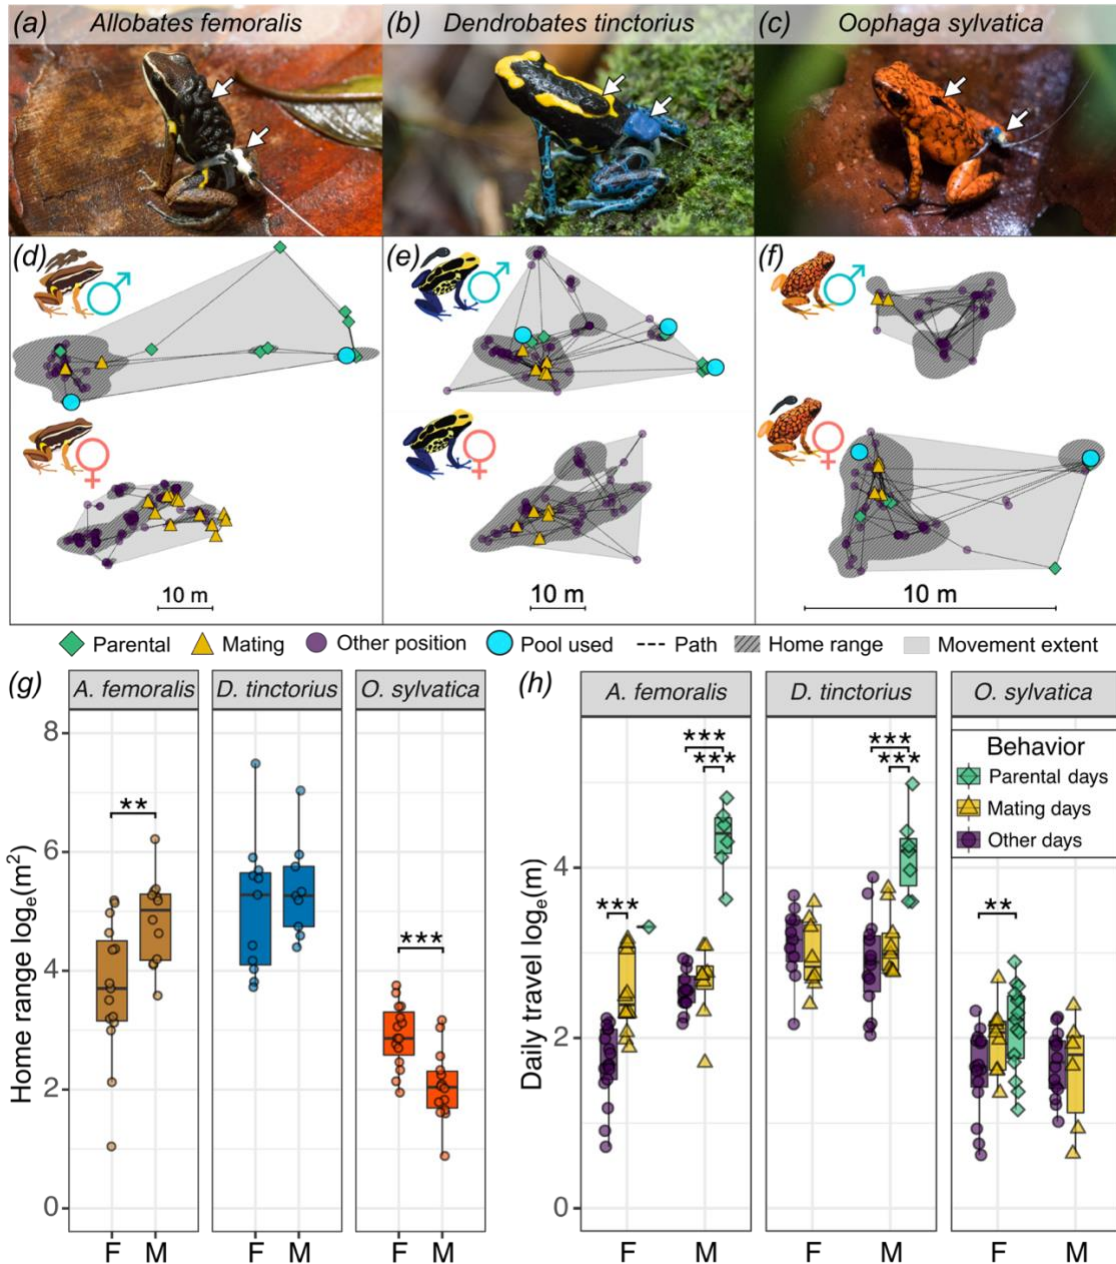

220  
221  
222  
223  
224  
225  
226  
227  
228  
229  
230  
231  
232  
233  
234

**Figure 1. Parental sex roles and behavior drive sex differences in poison frog space use.** Male (a, b) and female (c) individuals of each study species transporting tadpoles while wearing a tracking tag. White arrows indicate tadpoles and the tag. (d – e) Examples of representative space use patterns of one individual of each species and sex show different measured space use parameters. We calculated the daily travel as the cumulative distance (line) between all relocations (points) per day; the movement extent (gray shaded area); and the home range representing more intensely used areas (darker hatched area). Frog positions are classified to represent three types of behaviors associated with daily movements: parental behavior (green diamonds), mating behavior (yellow triangles), and other (purple circles). Light blue circles represent pools used for tadpole deposition. Note that the scale is different in the panel for (f) *O. sylvatica*. Boxplots show sex differences in home range size (g), and daily travel (h) between days when parental behavior, mating, or neither were observed. Plot rectangles indicate the lower and upper quartiles with the median line, whiskers extend to 1.5 times the interquartile limited by value range, and dots indicate individuals. As frogs were tracked for multiple days, average values per individual per behavioral category are shown. Days were categorized as pool visits or mating days if the corresponding behavior was observed at least on one relocation of that day. Y-axes are  $\log_e$ -transformed. Statistical significance levels are indicated as \*p 0.05 – 0.01, \*\*p < 0.01, \*\*\*p < 0.001.



235  
236

**Table 1. Home range size model summaries.**

| Predictors                               | <i>A. femoralis</i><br>log <sub>e</sub> (home range) |              | <i>D. tinctorius</i><br>log <sub>e</sub> (home range) |                  | <i>O. sylvatica</i><br>log <sub>e</sub> (home range) |                  |
|------------------------------------------|------------------------------------------------------|--------------|-------------------------------------------------------|------------------|------------------------------------------------------|------------------|
|                                          | Estimates (CI)                                       | <i>p</i>     | Estimates (CI)                                        | <i>p</i>         | Estimates (CI)                                       | <i>p</i>         |
| (Intercept)                              | 3.15<br>(1.1 – 5.2)                                  | <b>0.004</b> | 5.3<br>(4.0 – 6.6)                                    | <b>&lt;0.001</b> | 2.5<br>(1.6 – 3.4)                                   | <b>&lt;0.001</b> |
| Sex [male]                               | 0.9<br>(0.2 – 1.7)                                   | <b>0.015</b> | 0.2<br>(-0.9 – 1.3)                                   | 0.68             | -0.8<br>(-1.3 – -0.4)                                | <b>0.001</b>     |
| Tracking duration                        | 0.06<br>(-0.1 – 0.2)                                 | 0.46         | -0.02<br>(-0.1 – 0.06)                                | 0.62             | 0.04<br>(-0.04 – 0.1)                                | 0.36             |
| Observations                             | 25                                                   |              | 19                                                    |                  | 29                                                   |                  |
| R <sup>2</sup> / R <sup>2</sup> adjusted | 0.28 / 0.21                                          |              | 0.02 / 0.0                                            |                  | 0.40 / 0.35                                          |                  |

237 Summary of three linear models with log<sub>e</sub>-transformed home range size in *A. femoralis*, *D. tinctorius*, and *O. sylvatica*  
238 as the response variable, sex as the predictor, and tracking duration (in days) as a covariate. Statistical significance  
239 with *p* < 0.05 is highlighted in bold.

240

#### 241 *Sex differences in parental care do not predict navigational performance*

242 We tested if there were sex differences in navigational performance that reflected sex differences  
243 in parental roles and space use across species. When translocated 50 meters, *A. femoralis* males  
244 were more likely to return home (81% males, 44 % females), but both sexes of *D. tinctorius* (94%  
245 males, 94% females) and *O. sylvatica* (80% males vs 70% females,) were equally likely to return  
246 (Fig. 2 and Table 3). When translocated 200 meters, only males of *A. femoralis* (75% males, 0%  
247 females) and both females and males *D. tinctorius* (56% males, 39% females), but none of *O.*  
248 *sylvatica* were able to return home (Fig. 2 and Table 2). One *O. sylvatica* male could not be located  
249 after 6 days and was found back home two days later. *Allobates femoralis* were less likely to home  
250 back with higher daytime temperature, but the daytime temperature had no effect on homing  
251 success in *D. tinctorius* and *O. sylvatica* (Table 2). Frog weight had no effect on homing success.  
252 When translocated 50 meters, *A. femoralis* males explored larger areas than females, but we  
253 observed no sex difference in *D. tinctorius* and *O. sylvatica* (Fig. 3, Table S2). When translocated  
254 200 meters, males of all three species were more explorative than females (Fig. 3, Table 3). In  
255 addition, *A. femoralis* explored less with higher daytime temperature, but the daytime temperature  
256 did not affect the explored area in *D. tinctorius* or *O. sylvatica* (Table S2 and 3). Frog weight  
257 positively influenced the explored area only in *D. tinctorius* translocated 200 meters (Table 3).  
258 Among frogs that returned home, *A. femoralis* males returned more directly and faster from 50  
259 meters when compared to females (Fig. 3, Table 4 and S3). In *D. tinctorius*, females returned in

260 more direct paths than males from 200 m (Fig. 3, Table 4). We found no sex difference in *O.*  
 261 *sylvatica* homing. The same sex-difference pattern in homing accuracy was observed based on  
 262 angular deviation data (Annex 2). *Allobates femoralis* and *O. sylvatica* returned in less direct paths  
 263 and slower with higher daytime temperature. *Dendrobates tinctorius* returned slower with higher  
 264 daytime temperature, but temperature had no effect on trajectory straightness (Table 4 and S3).  
 265 Frog weight did not affect the homing duration.

266  
 267 To sum up our navigation experiments, we found that *A. femoralis* males navigate home faster and  
 268 more accurately, *D. tinctorius* females navigate more accurately from long distances, and males  
 269 across species display more exploration-related movement compared to females regardless of sex  
 270 differences in parental care roles.

271  
 272

**Table 2. Homing success model summaries**

| Predictors          | <i>A. femoralis</i> 50-m homing success |              | <i>D. tinctorius</i> 200-m homing success |          | <i>O. sylvatica</i> 50-m homing success |          |
|---------------------|-----------------------------------------|--------------|-------------------------------------------|----------|-----------------------------------------|----------|
|                     | Log-Odds                                | <i>p</i>     | Log-Odds                                  | <i>p</i> | Log-Odds                                | <i>p</i> |
| (Intercept)         | 107.8<br>(34.7 – 242.3)                 | <b>0.02</b>  | 18.7<br>(-23.9 – 65.4)                    | 0.4      | 152.65<br>(-127.6 – 543.3)              | 0.35     |
| Sex [male]          | 5.2<br>(1.7 – 12.4)                     | <b>0.03</b>  | 1.05<br>(-1.2 – 3.6)                      | 0.38     | 1.4<br>(-1.0 – 4.6)                     | 0.29     |
| Temp.               | -4.8<br>(-10.8 – -1.8)                  | <b>0.020</b> | -0.8<br>(-2.7 – 0.85)                     | 0.35     | -6.5<br>(-23.3 – 5.5)                   | 0.35     |
| Weight              | 4.7<br>(-1.9 – 13.0)                    | 0.19         | 0.2<br>(-1.0 – 1.5)                       | 0.74     | NA                                      |          |
| Observations        | 32                                      |              | 32                                        |          | 18                                      |          |
| R <sup>2</sup> Tjur | 0.59                                    |              | 0.07                                      |          | 0.10                                    |          |

273 Summary of three logistic regression models with homing success in *A. femoralis*, *D. tinctorius*, and *O. sylvatica* as  
 274 the response variable, sex as the predictor, and average daytime temperature (Temp.) and frog weight as covariates.  
 275 We did not perform statistical comparisons conditions *A. femoralis* 200-m because only males successfully returned;  
 276 for *O. sylvatica* 200-m because no frogs returned and for *D. tinctorius* 50-m because both sexes return at an equal rate.  
 277 Weight was excluded for *O. sylvatica* to achieve model convergence. Statistical significance with  $p < 0.05$  is  
 278 highlighted in bold.

279 **Table 3. Explored area model summaries**

| Predictors                               | <i>A. femoralis</i> 200-m<br>log <sub>e</sub> (explored area) |                  | <i>D. tinctorius</i> 200-m<br>log <sub>e</sub> (explored area) |                  | <i>O. sylvatica</i> 200-m<br>log <sub>e</sub> (explored area) |              |
|------------------------------------------|---------------------------------------------------------------|------------------|----------------------------------------------------------------|------------------|---------------------------------------------------------------|--------------|
|                                          | Estimates                                                     | <i>p</i>         | Estimates                                                      | <i>p</i>         | Estimates                                                     | <i>p</i>     |
| (Intercept)                              | 28.0<br>(8.7 – 47.4)                                          | <b>0.006</b>     | 5.6<br>(-7.65 – 18.9)                                          | 0.39             | 30.85<br>(-97.0 – 158.7)                                      | 0.61         |
| Sex [male]                               | 1.5<br>(0.9 – 2.1)                                            | <b>&lt;0.001</b> | 1.5<br>(0.8 – 2.2)                                             | <b>&lt;0.001</b> | 0.8<br>(0.02 – 1.7)                                           | <b>0.045</b> |
| Temp.                                    | -1.0<br>(-1.8 – -0.2)                                         | <b>0.017</b>     | -0.04<br>(-0.6 – 0.5)                                          | 0.87             | -0.9<br>(-6.4 – 4.5)                                          | 0.72         |
| Weight                                   | 1.0<br>(-0.5 – 2.5)                                           | 0.19             | 0.6<br>(0.2 – 0.9)                                             | <b>0.004</b>     | -1.4<br>(-3.2 – 0.3)                                          | 0.10         |
| Observations                             | 30                                                            |                  | 32                                                             |                  | 15                                                            |              |
| R <sup>2</sup> / R <sup>2</sup> adjusted | 0.56 / 0.51                                                   |                  | 0.41 / 0.35                                                    |                  | 0.38 / 0.21                                                   |              |

280 Summary of three linear models with log<sub>e</sub>-transformed explored area in *A. femoralis*, *D. tinctorius*, and *O. sylvatica*  
 281 as the response variable, sex as the predictor, and average daytime temperature (Temp.) and frog weight as covariates.  
 282 Statistical significance with *p* < 0.05 is highlighted in bold.

283  
 284 **Table 4. Homing trajectory straightness model summaries**

| Predictors     | <i>A. femoralis</i> 50-m<br>homing straightness |                  | <i>D. tinctorius</i> 50-m<br>homing straightness |          | <i>D. tinctorius</i> 200-m<br>homing straightness |              | <i>O. sylvatica</i> 50-m<br>homing straightness |              |
|----------------|-------------------------------------------------|------------------|--------------------------------------------------|----------|---------------------------------------------------|--------------|-------------------------------------------------|--------------|
|                | Estimates                                       | <i>p</i>         | Estimates                                        | <i>p</i> | Estimates                                         | <i>p</i>     | Estimates                                       | <i>p</i>     |
| (Intercept)    | 28.7<br>(12.6 – 44.9)                           | <b>&lt;0.001</b> | 2.0<br>(-18.9 – 22.9)                            | 0.85     | 8.9<br>(-0.7 – 18.5)                              | 0.069        | 111.0<br>(25.9 – 196.0)                         | <b>0.011</b> |
| Sex [male]     | 0.7<br>(0.1 – 1.3)                              | <b>0.017</b>     | -0.05<br>(-0.8 – 0.7)                            | 0.89     | -0.5<br>(-0.9 – -0.02)                            | <b>0.039</b> | 0.5<br>(-0.4 – 1.3)                             | 0.30         |
| Temp.          | -1.1<br>(-1.8 – -0.5)                           | <b>0.001</b>     | -0.04<br>(-0.9 – 0.8)                            | 0.93     | -0.4<br>(-0.75 – 0.03)                            | 0.071        | -4.8<br>(-8.4 – -1.1)                           | <b>0.011</b> |
| Observations   | 17                                              |                  | 22                                               |          | 15                                                |              | 13                                              |              |
| R <sup>2</sup> | 0.35                                            |                  | 0.001                                            |          | 0.39                                              |              | 0.44                                            |              |

285 Summary of four beta regression models with homing trajectory straightness in *A. femoralis*, *D. tinctorius*, and *O.*  
 286 *sylvatica* as the response variable, sex as the predictor, and average daytime temperature (Temp.) as a covariates.  
 287 Statistical significance with *p* < 0.05 is highlighted in bold.

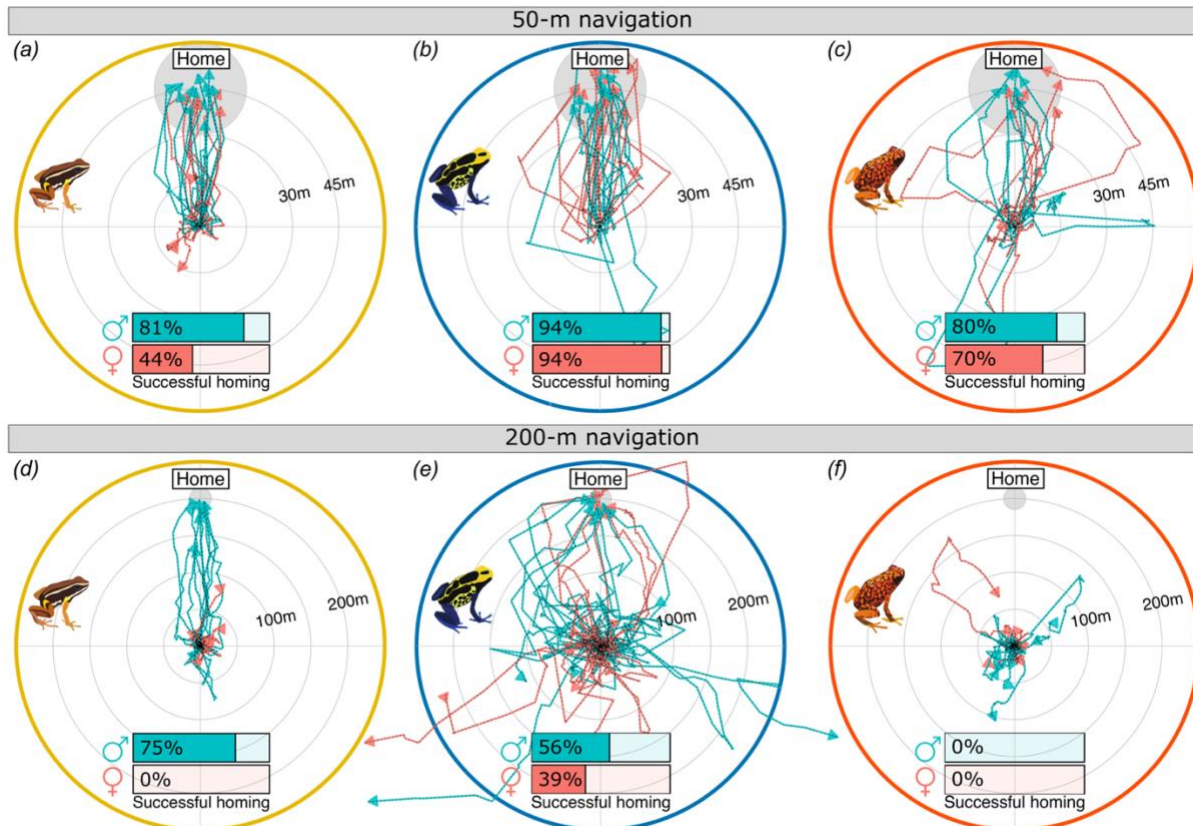

288  
289  
290  
291  
292  
293  
294  
295  
296

**Figure 2. Species and sex differences in movement trajectories of translocated poison frogs.** (a - f) Homeward normalized movement trajectories of (a , d) *A. femoralis*, (b, e) *D. tinctorius*, and (c, f) *O. sylvatica* translocated approximately 50 meters (a – c) or 200 meters (d – f) from home. All trajectories are normalized to a common start location (center of the plot) and home direction (top of the plot). The approximate home area is indicated by a gray circle. Each line corresponds to a different individual with male trajectories in teal and female in red. The proportion of each sex that showed homing behavior is indicated on inserted bar plots. Frogs were considered homing if they completed at least 70% of the distance from the release site to the home center within three or six days for 50 m and 200 m, respectively.

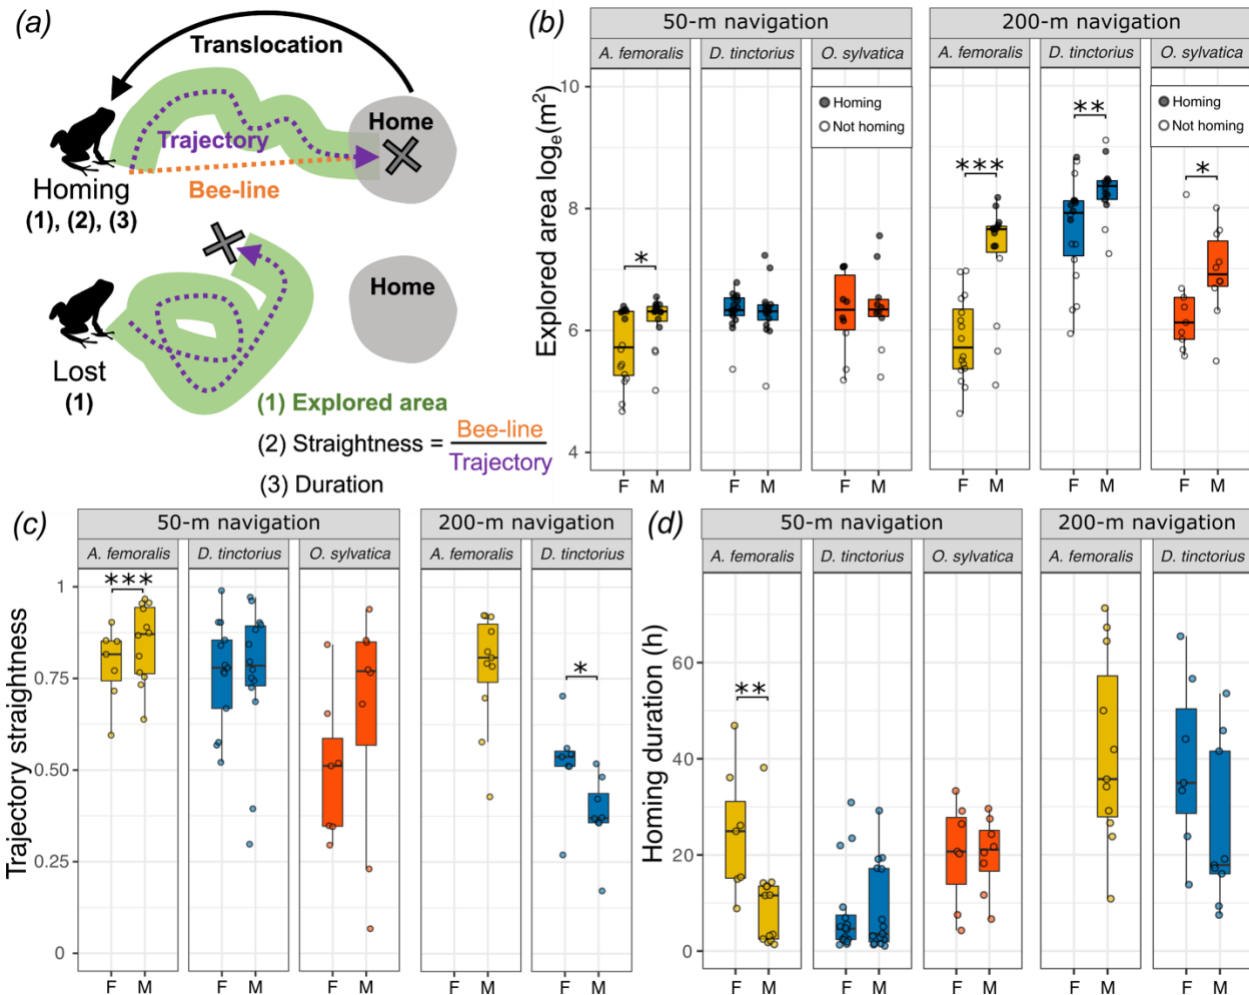

297  
 298 **Figure 3. Sex differences in poison frog exploration and navigational performance.** (a) Schematic representation  
 299 of the parameters measured during navigation experiments which are plotted in panels (b - d). Explored area (b),  
 300 trajectory straightness (c), and homing duration (d) were measured for successful homing, while only explored area  
 301 (b) were measured for frogs that did not return home. Boxplots show sex differences in (b) explored area ( $\log_{10}$ -  
 302 transformed), (b) homing trajectory straightness, and (c) homing duration. (a) Filled and empty circles indicate  
 303 individuals that were homing or not. Plot rectangles indicate the lower and upper quartiles with the median line,  
 304 whiskers extend to 1.5 times the interquartile limited by the value range, and dots indicate individuals. Statistical  
 305 significance levels are indicated as \*p < 0.05 – 0.01, \*\*p < 0.01, \*\*\*p < 0.001.  
 306

### 307 *Androgens correlate with navigation-associated behavior*

308 We also investigated the relationship between androgen levels and spatial behavior during the  
 309 navigation task described above. There was a high inter-individual variation of androgen levels in  
 310 both sexes of all species, but on average, males showed higher androgen levels in all three species  
 311 (Fig. 4, Table S4). There were no significant differences between baseline and back-home samples  
 312 in all three species (Fig. 4, Table S4). Baseline levels did not influence exploration, homing  
 313 duration, nor trajectory straightness in *A. femoralis* (Fig 4, Table S5). Baseline androgen levels,  
 314 together with sex, translocation distance, and frog weight significantly predicted exploration in *D.*



315 *tinctorius*, but did not influence homing duration or trajectory straightness (Fig. 4, Table S6).  
 316 Baseline levels significantly predicted trajectory straightness, but not exploration or homing  
 317 duration in *O. sylvatica* (Fig. 4, Table S7). The explored area had a significant positive effect and  
 318 successful homing a significant negative effect on delta androgen levels in *A. femoralis*, but not in  
 319 *D. tinctorius* and *O. sylvatica* (Table S8).

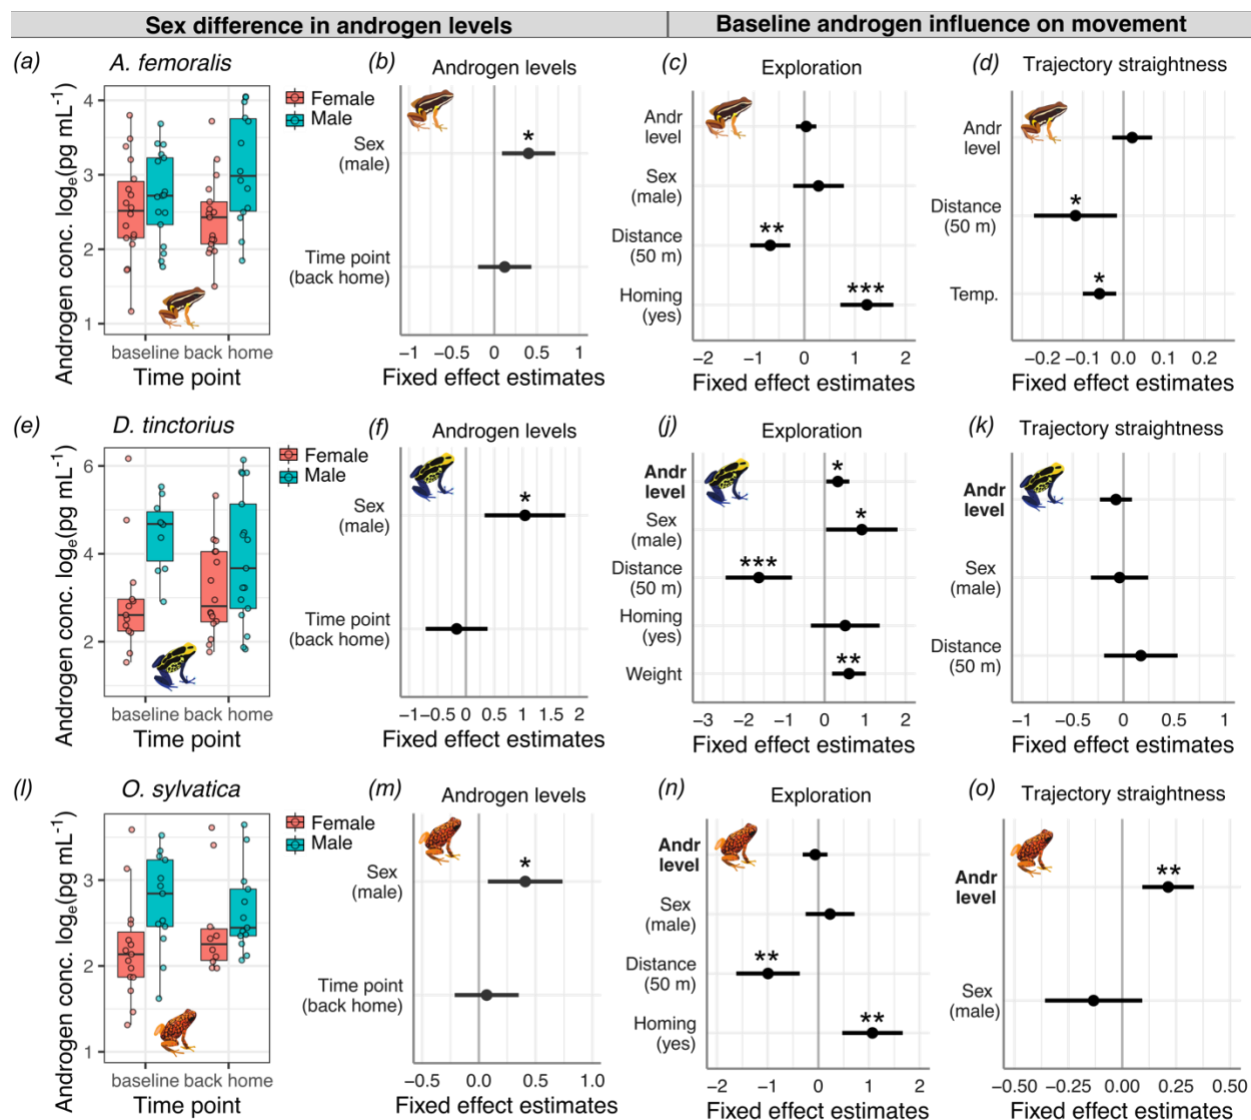

320  
 321 **Figure 4. Relationships between androgen levels and spatial behavior.** Boxplots show sex differences in water-  
 322 borne androgen concentration measured before and after the navigational task in (a) *A. femoralis*, (e) *D. tinctorius*,  
 323 and (l) *O. sylvatica*. The coefficient plots indicate the effect size and confidence intervals of androgen level difference  
 324 between sexes and the two sampling points for (b) *A. femoralis*, (f) *D. tinctorius*, and (m) *O. sylvatica* and the influence  
 325 of androgen levels and other factors on exploration (c, j, n) and homing trajectory straightness (d, k, o) in each species.  
 326 Androgen concentrations are natural log<sub>e</sub>-transformed. Statistically significant levels are indicated as \*p 0.05 – 0.01,  
 327 \*\*p < 0.01, \*\*\*p < 0.001.

| Life history                                                                                                                   |                                                                                                                                                                        | Predicted                                                                         |                                                                                   | Observed                                                                           |                                                                                     |                                                                                     |
|--------------------------------------------------------------------------------------------------------------------------------|------------------------------------------------------------------------------------------------------------------------------------------------------------------------|-----------------------------------------------------------------------------------|-----------------------------------------------------------------------------------|------------------------------------------------------------------------------------|-------------------------------------------------------------------------------------|-------------------------------------------------------------------------------------|
| Parental sex                                                                                                                   | Territoriality                                                                                                                                                         | Space use                                                                         | Navigation                                                                        | Space use                                                                          | Short-distance navigation                                                           | Long-distance navigation                                                            |
| <i>O. sylvatica</i><br>Extended care<br>      |                                                                                       |  |  |  |  |  |
| <i>D. tinctorius</i><br>Tadpole transport<br> | <br> |  |  |  |  |  |
| <i>A. femoralis</i><br>Tadpole transport<br>  |                                                                                       |  |  |  |  |  |

328  
329 **Figure 5. Summary of sex and species differences in life-history traits, predicted, and observed space use and**  
330 **navigation performance.** Red and teal circles represent the space use extent for females and males, respectively,  
331 and dotted arrows represent homing after translocations. Orange frame highlights the observed outcomes that differed  
332 from the predictions. In all cases, we found no sex differences where differences were expected. \*Sex difference only  
333 observed in long-term movements and qualitatively in vertical space use (see Annex 1).  
334

## 335 Discussion

336 Sex differences in spatial behaviors are typically interpreted through the lens of the adaptive  
337 specialization hypothesis, where larger home ranges and better navigational abilities in males are  
338 seen as adaptive traits (Jones et al., 2003). This has been countered with the androgen spillover  
339 hypothesis, which suggests that enhanced spatial abilities in males are a byproduct of higher male  
340 androgen levels rather than an adaptation (Clint et al., 2012). However, there are no comparative  
341 studies where females and males of closely related species have reversed spatial behavior and are  
342 expected to show a reversal in spatial abilities. Here, we linked the reproductive strategies, space  
343 use, navigational performance, and androgen levels in three species of frogs that differ in which  
344 sex performs spatially-relevant parental care tasks that tie spatial accuracy to reproductive fitness  
345 (Figure 5). We found that parental care shapes sex differences in space use, but no evidence that  
346 sex differences in navigational performance are linked to the reproductive strategy. Importantly,  
347 we found that females did not outperform males in *O. sylvatica*, the species with more complex  
348 female spatial behavior and larger home ranges associated with female parental care. We also  
349 found that males of all three species tended to be more explorative than females, and had higher  
350 androgen levels. Moreover, increased androgen levels were associated with higher exploration in

351 two species with male care and navigational accuracy in the species with female care, leaving open  
352 the possibility that sex differences in spatial behavior might result from sex differences in androgen  
353 levels independent of the differences in parental sex roles.

354

### 355 *Reproductive strategy shapes species and sex differences in space use*

356 We show that parental care in poison frogs increases the mobility of the caring sex and thus shapes  
357 the sex differences in space use. In *D. tinctorius* and *A. femoralis*, males transport tadpoles outside  
358 their territory and provide no further care. As we predicted, *A. femoralis* males have a much wider  
359 space use than females. Male long-distance movements were primarily observed during tadpole  
360 transport and occasional territory shifts, while female space use extent was mainly driven by mate-  
361 seeking. This sex difference was less pronounced in *D. tinctorius*, where males did not differ from  
362 females in short-term space use based on tracking. Males, however, moved over a wider range  
363 based on long-term capture-recapture data (Annex 1). The apparent difference between short-term  
364 and long-term data in *D. tinctorius* could be due to real sex differences only emerging in longer-  
365 term space use patterns, or the limited statistical power to detect a slight sex difference with a  
366 much smaller sample size in the tracking dataset. *Dendrobates tinctorius* males also moved the  
367 longest distances on tadpole transport days. During tadpole transport, males also climbed vertically  
368 to reach water-filled treeholes high above the ground, which they are known to use for tadpole  
369 deposition (Fouilloux et al., 2021). Our space use data does not capture these vertical movements  
370 and thus might considerably underestimate *D. tinctorius* male mobility and associated sex  
371 differences in vertical space use qualitatively and quantitatively. We could not identify what drove  
372 wide-ranging horizontal movements in *D. tinctorius* females, but seeking better foraging sites has  
373 been suggested among the movement drivers in *D. tinctorius* (Born et al., 2010).

374

375 Including a species with female uniparental care whose spatial movements are tied to reproductive  
376 fitness allowed us to ask whether enhanced mobility could be an adaptive trait linked to parental  
377 care. *Oophaga sylvatica* females must remember and revisit tadpole nurseries dispersed over tens  
378 of meters to provision their young with trophic, unfertilized eggs (Stynoski, 2009; Summers, 1992;  
379 this study). As predicted by the adaptive specialization hypothesis, tracking revealed larger female  
380 home ranges in *O. sylvatica*. Females typically moved between several reproductive pools and  
381 moved most when visiting or switching between the pool sites. Like *D. tinctorius* males, *O.*

382 *sylvatica* females regularly climbed vertically to water-filled plants up to ten meters above the  
383 ground, but these vertical movements are not captured in our space use data. Therefore, our data  
384 underestimated the mobility of *O. sylvatica* females and the resulting magnitude of the sex  
385 difference. In contrast, males did not climb above two meters, and their movements were restricted  
386 to exceedingly small calling territories. It remains unknown if males explore larger areas over the  
387 long term, particularly when searching for new territories. Overall, *O. sylvatica* showed more  
388 restricted movements than the two species with predominantly male parental care. Several  
389 previous studies in poison frogs indicate that species with extended female care, which includes  
390 tadpole provisioning, show more restricted space use than closely related species with male  
391 uniparental care (Brown et al., 2009; Donnelly, 1989; McVey et al., 1981; Murasaki, 2010;  
392 Pašukonis et al., 2019; Summers, 1992). Our data confirm that sex and species differences in space  
393 use across poison frogs can be explained, in big part, by species differences in the care-providing  
394 sex and the intensity of parental care.

395  
396 Research on sex differences in space use has typically focused on differences in mating strategies.  
397 For example, male bias in larger home ranges is well documented in rodents, where polygamous  
398 species tend to have greater sex differences than monogamous species (reviewed in Clint et al.,  
399 2012; Jones et al., 2003). In lizards, a meta-analysis of home range size in 60 species found that  
400 males have larger home ranges than females, and suggested that this sex difference is related to  
401 the mating system and access to females (Perry & Garland Jr, 2002). Our study shows that parental  
402 care can directly influence the space use of the caring sex resulting in sex differences in space use.  
403 Parental care has been hypothesized to reduce mobility in the caring sex because the research has  
404 focused on maternal care in lactating mammals (Barnett & McEwan, 1973; Sherry & Hampson,  
405 1997; Trivers, 1972). In contrast, moving with the offspring or for offspring provisioning is  
406 taxonomically widespread in vertebrates and invertebrates (Choe et al., 1997; Clutton-Brock,  
407 1991; Kölliker et al., 2012) and can increase mobility in the caring sex, thereby shaping sex  
408 differences in space use patterns in taxonomically diverse groups.

409  
410 *Species differ in navigational and movement strategy*

411 All three species showed well-developed homing ability, which is consistent with previous studies  
412 in amphibians, including various anurans (Arcila-Pérez et al., 2020; Dole, 1968; McVey et al.,

413 1981; Navarro-Salcedo et al., 2021, 2022; Pašukonis et al., 2014, 2018; Pichler et al., 2017;  
414 Shaykevich et al., 2021; Sinsch, 1987, 1992) and caudates (Diego-Rasilla et al., 2005; D. Grant et  
415 al., 1968; Joly & Miaud, 1989; Phillips et al., 1995; Sinsch, 2007; Twitty et al., 1964; reviewed in  
416 Ferguson, 1971; Sinsch, 2006; Wells, 2010). Despite limited movement capacity and sedentary  
417 lifestyle, many amphibians appear to share a general ability to navigate home after translocations  
418 from distances exceeding their routine movements (Sinsch, 1990, 2014). Moreover, the fact that  
419 species showing such tremendous variation in life history share this capacity suggests that well-  
420 developed navigational abilities play a fundamental role in amphibian reproduction and survival.  
421 Like many other tropical anurans, poison frogs rely on moving between small and scattered water  
422 bodies for reproduction, which might have selected for particularly highly developed navigational  
423 abilities in this group.

424  
425 Our results indicate that navigational and movement strategies differ even between closely related  
426 species. The scale and strategy of navigation varied between species and were related to species  
427 differences in home range size and reproductive strategy. For example, *O. sylvatica* did not return  
428 from longer translocation distances, in line with their much smaller home ranges than in *A.*  
429 *femoralis* and *D. tinctorius*. The correlation between home range size and homing performance  
430 further supports the hypothesis that poison frogs rely on exploration and spatial learning for  
431 navigation (Pašukonis et al., 2014, 2016, 2018). We also found notable species differences in  
432 movement and search strategies when animals were navigating home after translocations (Fig. 2,  
433 Annex 3, Fig. S4). *Allobates femoralis* tended to stay close to the release site for prolonged periods  
434 and then navigate back home via a direct path. Non-homing individuals moved very little and  
435 remained close to the release site. However, *D. tinctorius* showed wide-ranging exploratory  
436 movements and usually returned home through an indirect and lengthy route. Similarly, even  
437 though *O. sylvatica* returned home only from shorter distances, they also showed some wide-  
438 ranging exploratory behavior that was never observed in *A. femoralis*. We hypothesize that some  
439 of these species differences could be linked to movement strategy differences selected under  
440 different predation pressure. *Dendrobates tinctorius* and *O. sylvatica* are brightly colored species  
441 that forage actively to acquire their alkaloid-based chemical defenses from the invertebrate diet  
442 (Santos et al., 2016; Santos & Cannatella, 2011). Aposematic coloration may reduce predation  
443 pressure and the cost of movement while potentially increasing exploration (Carvajal-Castro et al.,



2021; Pough & Taigen, 1990; Speed et al., 2010; Summers, 2019; Toft, 1981), allowing different navigational strategies. *Allobates femoralis*, on the other hand, is cryptically colored, non-toxic, and a generalist sit-and-wait forager. Predation pressure is likely to be much higher and the movement more costly for cryptic species, thus potentially selecting more efficient orientation strategies. These differences between closely related species provide a remarkable system for future work on the selective pressures shaping the animal movement and navigational strategy.

450

#### 451 *Navigational performance provides no evidence for adaptive sex differences*

452 The adaptive specialization hypothesis is the leading hypothesis to explain variation in home range  
453 size and spatial memory between species and sexes in mammals. It predicts that adaptive sex  
454 differences in navigational ability are linked to life history traits. We found no evidence for  
455 adaptive sex differences in navigational ability in poison frogs. Contrary to our prediction, we  
456 found no sex difference in the navigational performance of *D. tinctorius*, a species with male  
457 uniparental care. Not only did males not outperform females, but females even showed slightly  
458 more accurate homing trajectories than males when navigating long distances. However, the lack  
459 of sex differences in the navigational performance of *D. tinctorius* somewhat fits the limited sex  
460 differences in space use observed in this species. Crucially, although females of *O. sylvatica* have  
461 larger space use and perform tadpole transport and egg provisioning, we found no sex differences  
462 in the navigational performance. Previous research on amphibians has also shown patterns  
463 inconsistent with sex differences in spatial abilities being an adaptive trait linked to reproductive  
464 strategy. Place discrimination tasks have not revealed consistent sex differences in *Engystomops*  
465 *pustulosos*, a frog species where females seek for and move between the males (Liu & Burmeister,  
466 2017; Ventura et al., 2019). Using translocation and recapture methods, one recent study in  
467 *Andinobates bombetes*, a poison frog with male uniparental care, found no sex differences in  
468 homing rates after translocation (Arcila-Pérez et al., 2020). Another recent recapture study in the  
469 glass frog *Ikakogi tayrona*, a species with prolonged maternal care and male territoriality, found  
470 that only males, but not females, showed homing after translocations (Navarro-Salcedo et al.,  
471 2022). Together, our findings and the growing literature on amphibian navigation parallel findings  
472 in mammals, where males typically outperform females in spatial tasks or no sex differences are  
473 found.

474

475 The only species with marked sex differences in navigational performance was *A. femoralis*, where  
476 males were more likely to return home, returned from longer distances, and returned faster and  
477 more accurately than females. This finding is partially unexpected because *A. femoralis* females  
478 commute between males for reproduction (M.-T. Fischer et al., 2020; E. Ringler et al., 2012) and  
479 remember the exact locations of their clutches (E. Ringler et al., 2016). However, because non-  
480 homing *A. femoralis* females typically stay stationary, it is difficult to disentangle the lack of  
481 motivation from their inability to return home. We expected that *A. femoralis* females would be  
482 motivated to return home because they show site fidelity (M.-T. Fischer et al., 2020; M. Ringler  
483 et al., 2009; this study) and monitor the presence of their mating partners to eventually take over  
484 tadpole transport in case of male absence (E. Ringler, Pašukonis et al., 2015). Indeed, females  
485 returned, albeit slower from shorter translocation distances, indicating that they were motivated to  
486 return in a sufficiently familiar area. In addition, homing females showed less directed homing,  
487 suggesting a sex difference in orientation accuracy. However, males may be more motivated to  
488 return home quickly because they risk losing both their territory and all current offspring due to  
489 territorial takeovers and potential cannibalism by other males (E. Ringler et al., 2017). We believe  
490 that male *A. femoralis* likely have better navigational abilities than females, but the motivational  
491 state linked to each individual's current reproductive or parental status may explain some of the  
492 sex and inter-individual differences observed in homing performance.

493

#### 494 *Males explore more than females*

495 Males are bolder and more explorative in several species and taxa (e.g., fish: Harris et al., 2010;  
496 King et al., 2013; bird: Schuett & Dall, 2009) and multiple adaptive hypotheses have been  
497 proposed to explain increased exploration (reviewed in Schuett et al., 2010; Trivers, 1972). Sex  
498 differences in exploration tendency could be connected to the sex-biased dispersal observed in  
499 different mating strategies, where male-biased dispersal is common in polygamous mammals  
500 while female-biased dispersal is common in monogamous birds (Greenwood, 1980; Li & Kokko,  
501 2019; Mabry et al., 2013). However, in birds and mammals, sex, mating systems, and parental care  
502 are tightly linked, making it difficult to disentangle factors shaping sex differences in exploratory  
503 behavior. In the present study, males of all three species tended to be more explorative than  
504 females, particularly when translocated longer distances and, therefore, in less familiar  
505 environments. Even in *O. sylvatica*, a species where females perform parental care and have wider

506 space use, males tended to be more explorative after translocations. Male-biased dispersal and  
507 higher male exploration rates have also been observed in some frogs without parental care  
508 (*Engystomops pustulosus*: Lampert et al., 2003; *Bufo bufo*: Ogurtsov et al., 2018; *Xenopus*  
509 *tropicalis*: Videlier et al., 2015). Thus, regardless of parental care strategies, different life histories,  
510 and sex differences in home range size, male amphibians tend to be more exploratory, suggesting  
511 that other factors, such as male-biased dispersal and high intra-sexual male competition may be  
512 associated with the sex difference in exploration.

513

#### 514 *Linking androgens to exploration and navigation*

515 Androgens have been linked to spatial abilities in mammals for several decades (Dawson et al.,  
516 1975; Galea et al., 1995; Isgor & Sengelaub, 1998; Joseph et al., 1978; Schulz & Korz, 2010;  
517 Sherry & Hampson, 1997; Stewart et al., 1975; Williams et al., 1990). Clint et al. (2012) proposed  
518 that the often observed male superiority in spatial navigation might be a side effect of sex  
519 difference in androgen levels rather than an adaptation to direct selective pressures on males'  
520 spatial abilities. Our results are somewhat in line with this hypothesis as females did not  
521 outperform males when expected based on adaptive predictions. Additionally, although we did not  
522 observe a correlation between homing success and androgen levels, we found three associations  
523 between androgen levels and spatial behavior.

524

525 Higher baseline androgen levels predicted more exploration after translocation in *D. tinctorius*,  
526 and the amount of exploration during the navigation task was associated with an increase in  
527 androgen levels in *A. femoralis*. We also found that males, on average, had higher androgen levels  
528 and higher exploration rates despite the variation in the parental sex roles and high inter-individual  
529 variation. Exploration underlies the development of most spatio-cognitive abilities (McNaughton  
530 et al., 2006; O'keefe & Nadel, 1978), including spatial memory, presumably used by poison frogs  
531 for navigation (Beck et al., 2017; Liu et al., 2016, 2019; Pašukonis et al., 2014, 2016, 2019).  
532 Therefore, the association of explorative behavior with androgen levels, especially during the  
533 development of spatial memory, might have cascading effects on sex differences in spatial  
534 behavior and abilities. Quantifying or manipulating androgen levels during ontogeny and learning,  
535 rather than during the spatial task performance, might provide a better understanding of the link  
536 between individual differences in the navigational performance observed in our study and

537 androgen levels. We also found that baseline androgens correlated with homing accuracy in *O.*  
538 *sylvatica* in both sexes, further supporting a potential link between androgens and navigational  
539 performance. While experimental androgen manipulations are needed to understand the interplay  
540 between hormone levels and spatial behavior, our findings lend more support to the androgen  
541 spillover hypothesis of sex differences in spatial cognition.

542

### 543 *Conclusions*

544 We found that parental behavior drives space use patterns but not the navigational performance in  
545 poison frogs. Most observed sex differences indicated more developed navigational ability and  
546 increased exploratory tendency in males, even in species where females show wider-ranging  
547 movement for parental care and mate-seeking. Indeed, most previous literature on sex differences  
548 in vertebrate spatial abilities shows either no sex differences or better performance in males. We  
549 also found higher average androgen levels in males of all three species despite the marked species  
550 differences in parental sex roles and aggressive female behavior. However, there was a high inter-  
551 individual variation in androgens and a large overlap between sexes. Some of this inter-individual  
552 variation in androgen levels was related to individual differences in exploration and homing  
553 accuracy, suggesting an interplay between androgens and spatial behavior. Therefore, our findings  
554 are more consistent with the androgen spillover hypothesis than the widely accepted adaptive  
555 specialization hypothesis. We speculate that sex differences in spatial abilities could be a  
556 byproduct of selective pressures on sexual traits such as aggressiveness and the associated increase  
557 in androgen levels. However, the indirect effects of androgens, such as increased male exploration  
558 tendency, are likely to be adaptive and maintained in the context of male territoriality and  
559 widespread male parental care in poison frogs.

560

## 561 **Materials and Methods**

### 562 *Study species*

563 We studied three poison frog species with different life histories and parental sex roles: the  
564 Brilliant-Thighed Poison Frog (*Allobates femoralis* [Boulenger 1884], Aromobatidae), the Dyeing  
565 Poison Frog (*Dendrobates tinctorius* [Cuvier 1797], Dendrobatidae), and the Diablito Poison Frog  
566 (*Oophaga sylvatica* [Funkhouser 1956], Dendrobatidae). *Allobates femoralis* and *D. tinctorius*  
567 occur in syntopy in the Guiana Shield, but *A. femoralis* has a wider range across Amazonia (T.

568 Grant et al., 2006). *Oophaga sylvatica* is endemic to the Chocoan Rainforest of the Pacific Coast  
569 of Ecuador and Colombia (T. Grant et al., 2006). All three species are diurnal, breed throughout  
570 the local rainy season, and shuttle tadpoles from terrestrial clutches in the leaf litter to aquatic  
571 tadpole nurseries (T. Grant et al., 2006; Silverstone, 1975, 1976). In *A. femoralis*, groups of up to  
572 ~ 20 tadpoles are predominantly transported by territorial males and deposited in terrestrial pools  
573 (E. Ringler et al., 2013; Roithmair, 1992). Females take over tadpole transport when males  
574 disappear (E. Ringler, Pašukonis, et al., 2015). In *D. tinctorius*, one or two tadpoles are transported  
575 by males (but see E. K. Fischer & O'Connell, 2020; Rojas & Pašukonis, 2019 for reports of female  
576 transport) to terrestrial and arboreal pools (Fouilloux et al., 2021; Rojas, 2014, 2015; Rojas &  
577 Pašukonis, 2019). After tadpole deposition into pools, no further parental care is provided in *A.*  
578 *femoralis* and *D. tinctorius*. In contrast, one or two tadpoles of *O. sylvatica* are transported by  
579 females and deposited into water-filled plants (Silverstone, 1973; Summers, 1992; Zimmermann  
580 & Zimmermann, 1981). Tadpoles feed on unfertilized eggs, which the mother returns to provide  
581 every ~ 3 - 7 days (this study and personal observation by E. Tapia communicated to LAC). In all  
582 three species, males and females show site fidelity, but the levels of aggressiveness and  
583 territoriality vary. In *A. femoralis* and *O. sylvatica*, males vocally advertise and aggressively  
584 defend small territories, while females visit males for mating and show no aggressive behavior  
585 (M.-T. Fischer et al., 2020; M. Ringler et al., 2009; Roithmair, 1992; Silverstone, 1973; Summers,  
586 1992; this study). In *D. tinctorius*, both males and females show intra-sexual aggression as part of  
587 territoriality and/or mate guarding, but males do not vocally advertise (Born et al., 2010; Rojas &  
588 Pašukonis, 2019; this study).

589

### 590 *Study sites*

591 Data for *A. femoralis* and *D. tinctorius* were collected over five field seasons between 2016 and  
592 2020 in two different plots at the Nouragues Ecological Research Station (4°02' N, 52°41' W) in  
593 the Nature Reserve Les Nouragues, French Guiana. One plot consists of ~25 ha of lowland  
594 rainforest bordering the Arataï river where both *A. femoralis* and *D. tinctorius* naturally occur. The  
595 other plots consist of a 5-ha island in the Arataï river where *A. femoralis* and *D. tinctorius* were  
596 absent, but an experimental population of *A. femoralis* was successfully introduced in 2012 (E.  
597 Ringler, Mangione, et al., 2015). The island population relies primarily on an array of artificial  
598 pools for breeding but otherwise lives under natural conditions (E. Ringler et al., 2018). Data for



599 *O. sylvatica* were collected at two sites in Ecuador: Sapoparque La Florida (0°15' S, 79°02' W) in  
600 2017 and Reserva Canandé (0°32' N, 79°13' W) in 2019. The La Florida study area (enclosure site  
601 hereafter) consisted of a free-ranging population of *O. sylvatica* introduced and kept in two forest  
602 enclosures of ~0.25 ha each inside their natural habitat. The natural breeding pools in the  
603 enclosures were supplemented by a high density of small artificial plastic pools and suitable plants.  
604 The Reserva Canandé study site (natural site hereafter) consisted of a natural *O. sylvatica*  
605 population, relying only on natural pools (water-filled plants). For summarized study site and  
606 different dataset information see Annex 6 (Tables S9 and S10)

607

### 608 *Frog tracking*

609 To quantify frog movements, we used two tracking methods, which have been previously used to  
610 track poison frogs: harmonic direction-finding and radio-tracking (for more details see Annex 5).  
611 We tagged and tracked 311 frogs, located each frog multiple times a day (see further below), and  
612 recorded its position and any observed behavior. All study plots were mapped using precision  
613 compasses and laser distance meters, establishing a network of labeled reference points (for  
614 method details, see M. Ringler et al., 2016). The digital maps were used with the GIS software  
615 ArcPad 10 (ESRI, Redlands, USA) on handheld devices for recording the data in the field.  
616 Occasionally, when frogs moved out of the mapped area, we recorded their location by GPS  
617 position averaging. All data were collected as GIS spatial points with associated behavioral  
618 information, checked point-by-point at least twice, and corrected for errors such as wrong frog  
619 identities, duplicates, and impossible locations by one of the experiments. All suspect points where  
620 frog identity or location could not be unambiguously confirmed and corrected were removed.

621

### 622 *Quantification of space use*

623 To quantify space use, we tagged 36 *A. femoralis*, 31 *D. tinctorius*, and 31 *O. sylvatica*, which we  
624 localized 6055 times and tracked for periods ranging from <1 to 45 days per individual. A subset  
625 of these data was used in previous publications on female space use in *A. femoralis* (M.-T. Fischer  
626 et al., 2020) and tadpole transport in *D. tinctorius* (Pašukonis et al., 2019). When a frog lost its tag,  
627 we attempted to recapture and retag the individual to continue tracking. Identity was confirmed  
628 based on unique dorsal or ventral coloration patterns. We excluded all frogs that were tracked for  
629 less than two full days (not including the tagging and tag removal/loss day) without any

630 manipulation and handling (tag checks or retagging, see Annex 5). We also removed short and  
631 temporally disconnected tracking periods when the frog was retagged. In the end, we had data to  
632 quantify the space use of 29 *A. femoralis* (17 females and 12 males) tracked from 5 to 16 days  
633 (median = 14 days) and 26 *D. tinctorius* (11 females and 15 males) tracked for 3 to 45 days (median  
634 = 14 days). We tracked 29 *O. sylvatica* (14 females and 15 males) for 7 to 20 days (median = 10  
635 days) within enclosures and an additional 37 *O. sylvatica* (20 females and 17 males) for 2 to 8 days  
636 (median = 3 days) at the natural site.

637  
638 The sampling rate (number of locations per day) varied for different datasets and tracking periods.  
639 In particular, movements associated with specific behaviors of interest, such as the tadpole  
640 transport, were often sampled at a higher frequency. As the sampling rate influences the spatial  
641 parameters, we standardized the data by down-sampling all datasets to match the datasets with the  
642 lowest sampling rate (~ 4 points per day). An experienced observer (AP) down sampled the data  
643 in a two-step procedure that allowed to maintain the maximum spatial and behavioral information.  
644 We first counted the number of points per day and selected the days with more than 2 points above  
645 the daily average for the respective dataset. We then removed redundant points while trying to  
646 keep the most spatially and temporally distributed points, and points with rare behaviors, such as  
647 parental care and mating. In a second step, we automatically down-sampled the remaining dataset  
648 to a minimum sampling interval of 60 minutes while retaining intermediate points for long (>20  
649 m), fast movements, occurring within shorter than 60 minutes. The resulting dataset had 3 to 7  
650 points per day per frog (median = 4).

651  
652 For summary of space use variables see Annex 6 (Tables S11 and S12). To quantify the space use,  
653 we calculated the daily cumulative distance traveled (daily travel hereafter) for 84 frogs tracked  
654 for at least two full days. For 76 frogs tracked for a minimum of seven days, we also quantified  
655 the maximum movement extent area (movement extent hereafter) as a minimum convex polygon  
656 (MCP) and the home range as 95 % utilization density (UD) contour derived from kernel density  
657 estimation (KDE) using the “mcp” and “kernelUD” functions of the “adehabitatHR” R package  
658 (Calenge, 2006). The smoothing parameter for the KDE was calculated with a conservative plug-  
659 in bandwidth selection method with the “hpi” function of the “ks” R package (Chacón & Duong,  
660 2018).

661  
662 To quantify the influence of parental and reproductive behaviors on movement, we grouped  
663 behaviors into three categories: parental and pool associated behavior (parental behavior  
664 hereafter), mating associated behavior (mating behavior hereafter), and “other” when neither  
665 parental nor mating behavior was observed. Under parental behavior, we included direct  
666 observations of tadpole transport and egg-feeding, as well as all points where the frogs were  
667 located within one meter of known breeding pools. Males of *O. sylvatica* were sometimes observed  
668 next to breeding pools, but we did not consider that as parental behavior as parental care has not  
669 been reported in male *O. sylvatica* nor observed in this study. Under mating behavior, we included  
670 direct observations of courting and mating behaviors, as well as all points where the frogs were  
671 located within one meter from an opposite-sex individual. We categorized each tracking day as  
672 “parental”, “mating”, or “other” whenever the respective behavior was observed at least once on  
673 that day. On the days when both parental and mating behavior occurred (12 out of 84 parental  
674 behavior days), we categorized the day as “parental” because parental movements were larger in  
675 scale. To evaluate the influence of behavior on movement, we then compared the distance traveled  
676 on “parental”, “mating”, and “other” days.

677  
678 Our space use measures represent a snapshot of an animal's long-term movement, and some species  
679 were tracked in experimental study plots confined by enclosure or water. Therefore, we further  
680 validated our tracking data described above with three supplementary datasets, including short-  
681 term tracking of *O. sylvatica* in a natural population and multi-year capture-recapture data in  
682 natural populations of *A. femoralis* and *D. tinctorius* (Annex 1).

#### 683 684 *Quantification of navigational performance*

685 To quantify the navigational performance, we carried out translocations and measured homing for  
686 64 *A. femoralis* (32 females and 32 males), 67 *D. tinctorius* (35 females and 32 males), and 39 *O.*  
687 *sylvatica* (19 females and 20 males). Most frogs were tagged and tracked for at least 24 hours  
688 before translocation to establish site fidelity to the tagging areas. We presumed the tagging area to  
689 correspond to defended territories or core areas within the home range (collectively termed home  
690 areas hereafter). We further confirmed site fidelity by behavioral observations of calling, courtship,  
691 and repeated use of shelters. In a few instances, *A. femoralis* were translocated immediately after

692 tagging because the territories were already known from a concurrent study (Rodríguez et al.,  
693 2020). We did not translocate frogs transporting tadpoles or continuously moving away from the  
694 tagging site. The locations of each frog recorded in the home area before the translocation were  
695 used as reference points to establish the correct homeward direction and homing success. We  
696 translocated one male and one female simultaneously 50 or 200 meters away from their respective  
697 home areas. Frog movements were then tracked for 4 or 6 days for 50-m and 200-m translocation,  
698 respectively, or until the frogs returned within ~10 meters from their home areas. Frogs that did  
699 not return home within the given time were captured and released back at their home areas. In a  
700 few instances, the frogs were tracked for longer than 4 or 6 days, but the trajectories were truncated  
701 for the analysis.

702  
703 For translocation, each frog was captured and placed in an airtight and opaque container. We chose,  
704 measured, and located a release site on the study area map using a portable GIS/GPS device and  
705 carried the frogs to the release site. To disorient the frogs, the container was rotated multiple times  
706 and never carried in a straight line from the capture to the release site. All frogs were captured and  
707 released in the afternoon, and the translocation usually took between 30 to 90 minutes. We  
708 translocated one male and one female simultaneously from the same area towards the same  
709 direction and attempted to vary the translocation direction between pairs within the landscape  
710 constraints of the field site. Most frogs were released by placing the container on the ground for at  
711 least 5 minutes and then gently opening the lid allowing the frog to leave. In the case of *A. femoralis*  
712 tracked in 2017, frogs were removed from a bag by hand and placed under a flower pot with an  
713 opening for an exit. If the frogs did not leave the pot within 30 to 60 min, we lifted the pot by hand.  
714 These periods of 30 to 60 min were not included in the analysis.

715  
716 We directly observed and mapped the initial movements of each frog for at least 30 min after  
717 release. For this, we set up a radial grid with a 3-meter radius at the release site, made of colored  
718 strings for visual reference, and mapped the frog movements at approximately 0.3 m precision on  
719 a tablet PC running a custom Python (version 2.7.3) script allowing us to record the frog position  
720 in relation to the visual reference grid. Following the direct observation, we attempted to locate  
721 the frogs approximately every 20 to 60 minutes, although longer sampling gaps occurred due to  
722 local terrain and weather constraints.

723

724 For summary of navigation variables see Annex 6 (Tables S11 and S12). To measure the  
725 movement strategy and the navigational performance, we quantified (1) homing success, (2)  
726 explored area, (3) homing trajectory straightness, (4) homing duration, (5) and angular deviation  
727 from the home direction (Annex 2). We assumed that the frog is showing homing behavior (yes/no)  
728 if the frog approached at least 70% of the distance from the release site to the home area center,  
729 defined as the geometric average of frog positions prior to translocation. To estimate the explored  
730 area, we calculated the total area within five meters around the movement trajectory. The value is  
731 based on a putative perceptual range of a frog being at least five meters. Trajectory straightness  
732 was calculated as the ratio between the straight-line distance from the release site to the end of the  
733 homing trajectory and the cumulative distance of the actual homing trajectory. To calculate  
734 explored area and trajectory straightness, trajectories were down-sampled to the minimum  
735 sampling interval of 15 minutes. The homing duration was calculated as the time from the release  
736 of the frog to the moment when the frog crossed a 10-meter buffer drawn around the home area  
737 polygon. Night-time (12 hours per night) was excluded from homing duration because none of the  
738 study species moves at night. Homing success, explored area, and angular deviation were  
739 calculated for all translocated frogs. Trajectory straightness and duration were only estimated for  
740 the frogs that successfully returned home. Trajectory straightness and angular deviation could not  
741 be estimated for some frogs due to missing data in the trajectory.

742

#### 743 *Quantification of androgen levels*

744 For a subset of the frogs used in navigation experiments, we quantified androgen levels using non-  
745 invasive water sampling, following the methodology described elsewhere (Baugh & Gray-  
746 Gaillard, 2021; Rodríguez et al., 2022). Androgen levels were quantified once in the morning  
747 within 2 days before translocation (baseline hereafter) and again in the morning after the frogs  
748 returned home by themselves or were returned by the experimenter. We did not quantify androgen  
749 levels for the *A. femoralis* and *D. tinctorius* translocated in 2017. Each frog was placed in 40 mL  
750 of distilled water inside a small glass container with a dark cover for 60 minutes at the frog capture  
751 location and released immediately after. The water sample was pushed through a C18 cartridge  
752 (SPE, Sep-Pak C18 Plus, 360 mg Sorbent, 55 - 105 µm particle size, #WAT020515, Waters corp.,  
753 Milford, MA, USA) with a 20 mL sterile syringe. Cartridges were immediately eluted with 4 mL

754 of 98 % EtOH into 5 mL glass vials and were stored at first at 4 C when in the field and then  
755 transferred to -20 C until analysis.

756  
757 Before the ELISA, 1 mL or 2 mL of the original 4 mL sample was dried down with N<sub>2</sub> at 37 C  
758 and resuspended with 250 uL of the assay buffer (provided in the kit), and incubated overnight at  
759 4 C. Samples were brought to room temperature and shaken at 500 rpm for 1 h prior the assay.  
760 Samples were plated in duplicate and assays were performed following the manufacturer's  
761 protocol. Plates were read at 405 nm, with correction at 570 nm, using a microplate reader  
762 (Synergy H1, BioTek Instruments, Winooski, VT, USA) and the concentration of androgens was  
763 calculated using the software Gen5 (version 3.05, BioTek Instruments, Winooski, VT, USA). The  
764 detection limit for the assay was 7.8 and 2000 pg mL<sup>-1</sup> and samples that fell out of this range were  
765 removed from the analysis. The cross-reactivity of the testosterone antibody with other androgens  
766 is below 15% according to the manufacturer's manual. Samples with the average intra-assay  
767 coefficient of variation (CV) above 15% were excluded from the analysis and the resulting average  
768 CV was 5.7%. The average inter-assay CV was 7% for five out of nine assays and not available  
769 for the other four due to experimenter error. The final reported concentrations were adjusted for  
770 the sample volume taken (1 or 2 mL) and sample concentration during drying-resuspending.

771  
772 *Weather variables*

773 We measured the understory ambient temperature with temperature-data loggers (HOBO U23 Pro  
774 v2, Onset Computer Corp, Bourne, USA) placed ~30 cm above ground and recording temperature  
775 at 15 or 30-minute intervals. Because our study species are exclusively diurnal, we measured  
776 daytime temperature by averaging all measures from sunrise to sunset. At the *O. sylvatica*  
777 enclosure site, we manually measured temperature three times per day at the start, middle, and end  
778 of each tracking session with a handheld electronic thermometer (GFTH 95, GHM Messtechnik,  
779 Regenstauf, Germany) held slightly above the ground. We averaged the three measurements to  
780 obtain daytime temperature. We also calculated mean daytime temperatures for each frog during  
781 the navigation experiments by averaging daytime temperatures over the tracking period of each  
782 frog (also see Annex 6 Table S12). We did not use the rainfall data because they were strongly  
783 correlated with daytime temperature and missing for some tracking periods.

784



785 *Data analyses*

786 All statistics were generated in R Studio (version 1.0.153, RStudio Team, 2020) running R (version  
787 3.6.3, R Core Team, 2020). Space-use plots were generated in QGIS (version 2.14, QGIS.org,  
788 2022), box plots, trajectory plots, and bar plots with ggplot2 R package (Wickham, 2016), circular  
789 plots with circular R package (Agostinelli & Lund, 2022), model plots with sjPlot R package  
790 (Lüdecke, 2021). Schematic representations and further editing were done with Adobe Illustrator  
791 (version 25.2.3, Adobe Inc., Mountain View, CA, USA), and Microsoft PowerPoint (version  
792 16.54, Microsoft Corp., Redmont, WA, USA). All variables and statistical models are summarized  
793 in Annex 6 (Tables S11, S12, S13)

794

795 *Space use*

796 Spatial variables (daily travel, movement extent, home range, and explored area) approximately  
797 followed a log-normal distribution and thus we transformed the raw data by natural logarithm to  
798 fit the model assumptions. To investigate the sex differences in movement extent and home range,  
799 we fitted two linear models (LMs) with movement extent and home range as responses in each  
800 model respectively, and sex, species, and their interaction as predictors. As there was a strong  
801 interaction between species and sex for both models, we fitted a separate LM for each species with  
802 sex as the predictor. As movement extent and home range often correlate with tracking duration,  
803 we included the number of days tracked as a covariate. To investigate the influence of behavior  
804 and sex on the daily movement, we fitted linear mixed-effects models (LMMs) with daily travel  
805 as the response variable using the “lmer” function within the lme4 R package (Bates et al., 2015).  
806 We first fitted an LMM for each species with sex, behavior, and daytime temperature as fixed  
807 factors and frog identity and tracking date as random factors. We checked for a correlation between  
808 daily travel and number of points per day for each species (significant for *D. tinctorius* and *O.*  
809 *sylvatica*, but not for *A. femoralis*) and used number of points per day as a covariate in LMMs  
810 when the correlation was significant. For model selection we followed an information-theoretic  
811 approach (Burnham & Anderson, 2002) based on the Corrected Akaike’s Information Criterion  
812 (AICc). We calculated models with all combinations of fixed factors (behavior, sex, daytime  
813 temperature) while keeping random factors (id and date) and the covariate (number of points per  
814 day). We selected the best single model using the “model.sel” function within the MuMIn R  
815 package (Bartón & Barton, 2020). Because parental behaviors mostly occurred in one sex, we also

816 analyzed the influence of behavior on movement for each sex separately. We fitted separate LMMs  
817 for each sex of each species with behavior as a fixed factor, (factor with 2 or 3 levels: parental,  
818 mating, and other as appropriate for each species and sex), and frog identity and tracking date as  
819 random factors. The daytime temperature was only included as a fixed factor if the best model  
820 based on AICc included temperature (it did for *A. femoralis*, but not for *D. tinctorius* and *O.*  
821 *sylvatica*). We used least-squares means contrasts to compare daily travel between behavioral  
822 categories. Post hoc comparisons were done with the “emmeans” function within the emmeans R  
823 package (Lenth, 2022) with P-values adjusted by Tukey’s method for multiple comparisons  
824 (Tukey, 1977).

825

### 826 *Navigational performance*

827 As species and frogs translocated to different distances showed qualitatively very different  
828 movement and homing patterns, we fitted separate models per species and per translocation  
829 distance. To investigate the sex differences in the homing success we fitted generalized linear  
830 models (GLMs) with binomial error distribution and Logit link function using the “glm” function  
831 within R package stats (R Core Team 2020). We used the homing success as a binary response  
832 variable with sex, frog weight (except for *O. sylvatica*), and the mean daytime temperature during  
833 the entire tracking period as predictors. To investigate sex differences in exploration, we fitted an  
834 LM with the natural log-transformed explored area as the response variable and sex, mean daytime  
835 temperature, and frog weight as predictors. To investigate sex differences in homing trajectory  
836 straightness we fitted a beta regression model for proportions via maximum likelihood using the  
837 “betareg” function within the R package betareg (Cribari-Neto & Zeileis, 2010). We used  
838 straightness (ratio between 0 and 1) as the response variable with sex and mean daytime  
839 temperature as predictors. To investigate sex difference in homing duration we fitted an LM with  
840 natural log-transformed homing duration as the response variable and sex, mean daytime  
841 temperature, and frog weight as predictors.

842

### 843 *Androgen levels and navigation*

844 To investigate the relationship between androgens, sex, and movement, we fitted a series of  
845 separate models for each species. We first fitted LMMs with log-transformed androgen levels as  
846 the response variable, sex, and time point (two-level factor: baseline or back home) as fixed factors,

847 and frog identity as a random factor. For all three species, there was no interaction between sex  
848 and sampling time point, and the interaction factor was excluded. To investigate the relationship  
849 between baseline androgens and spatial behavior during navigation, we first fitted an LM for each  
850 species with the log-transformed explored area as the response variable and baseline androgen  
851 levels, sex, translocation distance, homing success, mean daytime temperature, and frog weight as  
852 predictors. For successfully homing frogs, we also fitted two GLMs (Gamma distribution, inverse  
853 link function) with trajectory straightness and homing duration as response variables and baseline  
854 androgen levels, sex, translocation distance, mean ambient temperature, and frog weight as  
855 predictors. To be able to evaluate the relative influence of different fixed factors on the response  
856 variables, we standardized all continuous predictors by centering and scaling using the “stdize”  
857 function from the MuMIn R package. We did not include sex for GLMs of trajectory straightness  
858 and homing duration of *A. femoralis* because androgen levels were available for only one homing  
859 female. If movement itself had an influence on androgen levels, we expected the amount of  
860 exploration to have a significant influence on androgen levels after the navigation task. Therefore,  
861 we calculated delta androgen levels by subtracting the baseline from the back home levels and  
862 fitted an LM with delta androgen levels as a response variable and the explored area, sex, tracking  
863 duration, homing success, mean daytime temperature, and frog weight as fixed factors. To reduce  
864 the number of covariates, for each model mentioned above, we compared the full models against  
865 a model without the mean temperature or the frog weight using the “drop1” function of the stats R  
866 package. We removed mean temperature and frog weight from the final model if the model  
867 excluding these factors (separately) was not significantly different ( $P > 0.1$ ).

#### 868 869 *Ethics statement and permits*

870 We strictly adhered to the current US, French, Ecuador, and European Union law, and followed  
871 the ‘Guidelines for use of live amphibians and reptiles in the field and laboratory research’ by the  
872 Herpetological Animal Care and Use Committee (HACC) of the American Society of  
873 Ichthyologists and Herpetologists (Beaupre et al., 2004); and the Association’s for the Study of  
874 Animal Behaviour (ASAB) ‘Guidelines for the use of live animals in teaching and research’  
875 (ASAB, 2020). The research was approved by the Institutional Animal Care and Use Committee  
876 of Stanford University (protocol ID 33211, issued to LAO) and by the Animal Ethics and  
877 Experimentation Board of the Faculty of Life Sciences, University of Vienna (approvals No 2016-

878 002, 2016-003, 2018-10, issued to AP). The permits in French Guiana were issued by the local  
879 authorities (DIREN permits: R03-2016-10-21-002, N°2015-289-0021, n°2011-  
880 44/DEAL/SMNBSP', issued to ER). In addition to these permits, all protocols for fieldwork were  
881 approved by the scientific committee of the Nouragues Ecological Research Station (approval  
882 communicated to AP) and the Nouragues Nature Reserve (partnership agreement No 01-2019 with  
883 AP, BR, ER, MR). The permits in Ecuador were issued by the local authorities (Ministerio de  
884 Ambiente, approval document No 013-18-IC-FAU-DNB/MA, issued to LAC). In addition, the  
885 authorization to work in Reserva Canandé was given by reserve authority Fundación Jocotoco,  
886 Ecuador (approval communicated to AP).

887

### 888 **Data availability**

889 All data and associated scripts will be made available after publication.

890

### 891 **Acknowledgments**

892 We are grateful to the staff of the CNRS Nouragues Ecological Research Station, Nouragues  
893 Nature Reserve, Fundación de Conservación Jocotoco, Reserva Canandé, Centro Jambatu de  
894 Investigación y Conservación de Anfibios, and Wikiri for logistic support and generously  
895 providing access to the study sites. We are deeply grateful to these organizations and their  
896 dedicated staff for their commitment to preserving our natural world and facilitating research. We  
897 thank Kristina Beck, Steffen Weinlein, Susanne Stückler, Eva K Fischer, Italo Tapia, and Vincent  
898 Premel for assistance in the field, Jinook Oh for coding the FroggerLogger Python script, and  
899 Walter Hödl for continuing inspiration and mentorship that has led to this study. This work is part  
900 of a partnership agreement between AP, BR, MR, ER and the Nouragues Nature Reserve to  
901 improve and spread the knowledge about amphibians.

902

### 903 **Funding**

904 The study was funded by The European Commission's Horizon 2020 research and innovation  
905 program under the Marie Skłodowska-Curie Actions grant agreement no. 835530 to AP, LAO,  
906 and Simon Benhamou; National Science Foundation CAREER grant (IOS-1845651) to LAO;  
907 Association for the Study of Animal Behaviour (ASAB) 2016 Research Grant to AP; Austrian  
908 Science Fund (FWF): P24788 & P31518 and FWF Herta-Firnberg Grant T699 to ER; P33728 and

909 FWF Erwin-Schrödinger Fellowship J3868-B29 to MR; FWF Erwin-Schrödinger Fellowship  
910 J3827-B29 to AP; CNRS Nouragues Travel Grants (AnaEE France ANR-11-INBS-0001)  
911 NTG2009 and NTG2010 to BR; NTG2015 to AP and BR. LAO is a New York Stem Cell  
912 Foundation – Robertson Investigator. ML received funding by the European Union’s Horizon 2020  
913 research and innovation program under the Marie Skłodowska-Curie grant agreement no. 79809.  
914 BR received funding from the Academy of Finland Research Fellowship (No. 319949). CR is  
915 funded by FWF-DK project W-1262 (Speaker: Tecumseh Fitch). LAC acknowledges the support  
916 of Wikiri and the Saint Luis Zoo. The Nouragues Ecological Research Station, managed by CNRS,  
917 benefits from “Investissement d’Avenir” grants managed by the Agence Nationale de la Recherche  
918 (AnaEE France ANR-11-INBS-0001; Labex CEBA ANR-10-LABX-25-01).

919

## 920 **Competing interests**

921 Authors declare no competing interests.

922

## 923 **Author contributions**

924 AP: Conceptualization (lead), methodology (lead), investigation-field (lead), investigation-  
925 laboratory (lead), data curation (lead), formal analysis (lead), data visualization (lead), writing-  
926 original draft (lead), funding acquisition (lead), permit acquisition (lead), other resources (lead),  
927 supervision (lead).

928 SJSR: Investigation-field (lead), data curation (supporting), formal analysis (supporting),  
929 writing-review & editing (supporting).

930 MTF: Investigation-field (supporting), data curation (supporting), writing-review & editing  
931 (supporting).

932 MCL: Methodology (supporting), investigation-field (supporting), formal analysis (supporting),  
933 funding acquisition (supporting), writing-review & editing (supporting).

934 DAS: Investigation-field (supporting), data curation (supporting), writing-review & editing  
935 (supporting).

936 BR: Methodology (supporting), investigation-field (supporting), data curation (supporting),  
937 funding acquisition (supporting), writing-review & editing (supporting).

938 MR: Methodology (supporting), investigation-field (supporting), data curation (supporting),  
939 writing-review & editing (supporting), other resources (supporting).

940 ABR: Investigation-field (supporting), writing-review & editing (supporting).

941 AML: Investigation-field (supporting), writing-review & editing (supporting).

942 ER: Writing-review & editing (supporting), funding acquisition (supporting), permit acquisition  
943 (lead), other resources (supporting), supervision (supporting).

944 CR: Methodology (supporting), investigation-laboratory (supporting), formal analysis  
945 (supporting), writing-review & editing (supporting).

946 LAC: Writing-review & editing (supporting), permit acquisition (lead), other resources  
947 (supporting).



948 LAO: Conceptualization (lead), methodology (supporting), data visualization (supporting),  
949 writing-original draft (supporting), writing-review & editing (supporting), funding acquisition  
950 (lead), permit acquisition (lead), other resources (lead), supervision (lead).  
951

## 952 References

- 953  
954 Agostinelli, C., & Lund, U. (2022). *R package “circular”: Circular Statistics (version 0.4-95)*. [https://r-](https://r-forge.r-project.org/projects/circular/)  
955 [forge.r-project.org/projects/circular/](https://r-forge.r-project.org/projects/circular/)
- 956 Aleman, A., Bronk, E., Kessels, R. P. C., Koppeschaar, H. P. F., & van Honk, J. (2004). A single  
957 administration of testosterone improves visuospatial ability in young women.  
958 *Psychoneuroendocrinology*, 29(5), 612–617. [https://doi.org/10.1016/S0306-4530\(03\)00089-1](https://doi.org/10.1016/S0306-4530(03)00089-1)
- 959 Arcila-Pérez, L. F., Atehortua-Vallejo, M. A., & Vargas-Salinas, F. (2020). Homing in the Rubí Poison  
960 Frog *Andinobates bombetes* (Dendrobatidae). *Copeia*, 108(4), 948–956. <https://doi.org/10.1643/CE->  
961 [19-284](https://doi.org/10.1643/CE-19-284)
- 962 ASAB. (2020). Guidelines for the treatment of animals in behavioural research and teaching. *Animal*  
963 *Behaviour*, 159, I–XI. <https://doi.org/10.1016/J.ANBEHAV.2019.11.002>
- 964 Barnett, S. A., & McEwan, I. M. (1973). Movements of virgin, pregnant and lactating mice in a  
965 residential maze. *Physiology & Behavior*, 10(4), 741–746. <https://doi.org/10.1016/0031->  
966 [9384\(73\)90155-8](https://doi.org/10.1016/0031-9384(73)90155-8)
- 967 Bartón, K., & Barton, M. K. (2020). *Multi-model inference (Package MuMIn: version 1.43.17)*.
- 968 Bates, D., Mächler, M., Bolker, B. M., & Walker, S. C. (2015). Fitting Linear Mixed-Effects Models  
969 Using lme4. *Journal of Statistical Software*, 67(1), 1–48. <https://doi.org/10.18637/JSS.V067.I01>
- 970 Baugh, A. T., & Gray-Gaillard, S. L. (2021). Excreted testosterone and male sexual proceptivity: A  
971 hormone validation and proof-of-concept experiment in túngara frogs. *General and Comparative*  
972 *Endocrinology*, 300, 113638. <https://doi.org/10.1016/J.YGCEN.2020.113638>
- 973 Beaupre, S. J., Jacobson, E. R., Lillywhite, H. B., & Zamudio, K. (2004). Guidelines for use of live  
974 amphibians and reptiles in field and laboratory research. In *Herpetological Animal Care and Use*  
975 *Committee (HACC)* (2nd revised edn). American Society of Ichthyologists and Herpetologists .
- 976 Beck, K. B., Loretto, M.-C., Ringler, M., Hödl, W., & Pašukonis, A. (2017). Relying on known or  
977 exploring for new? movement patterns and reproductive resource use in a tadpole-transporting frog.  
978 *PeerJ*, 2017(8), e3745. <https://doi.org/10.7717/peerj.3745>
- 979 Born, M., Bongers, F., Poelman, E. H., & Sterck, F. J. (2010). Dry-season retreat and dietary shift of the  
980 dart-poison frog *Dendrobates tinctorius* (Anura: Dendrobatidae). *Phyllomedusa: Journal of*  
981 *Herpetology*, 9(1), 37. <https://doi.org/10.11606/issn.2316-9079.v9i1p37-52>
- 982 Brown, J. L., Morales, V., & Summers, K. (2009). Home range size and location in relation to  
983 reproductive resources in poison frogs (Dendrobatidae): a Monte Carlo approach using GIS data.  
984 *Animal Behaviour*, 77(2), 547–554. <https://doi.org/10.1016/J.ANBEHAV.2008.10.002>
- 985 Brust, D. G. (1990). *Maternal brood care by Dendrobates pumilio: a frog that feeds its young* [Unpubl.  
986 Ph.D. thesis]. Cornell University.
- 987 Burkitt, J., Widman, D., & Saucier, D. M. (2007). Evidence for the influence of testosterone in the  
988 performance of spatial navigation in a virtual water maze in women but not in men. *Hormones and*  
989 *Behavior*, 51(5), 649–654. <https://doi.org/10.1016/J.YHBEH.2007.03.007>
- 990 Burnham, K. P., & Anderson, D. R. (2002). A practical information-theoretic approach. *Model Selection*  
991 *and Multimodel Inference*, 2, 70–71.
- 992 Calenge, C. (2006). The package “adehabitat” for the R software: A tool for the analysis of space and  
993 habitat use by animals. *Ecological Modelling*, 197(3–4), 516–519.  
994 <https://doi.org/10.1016/J.ECOLMODEL.2006.03.017>



- 995 Carvajal-Castro, J. D., Vargas-Salinas, F., Casas-Cardona, S., Rojas, B., & Santos, J. C. (2021).  
996 Aposematism facilitates the diversification of parental care strategies in poison frogs. *Scientific*  
997 *Reports* 2021 11:1, 11(1), 1–15. <https://doi.org/10.1038/s41598-021-97206-6>  
998 Chacón, J. E., & Duong, T. (2018). Multivariate Kernel Smoothing and its Applications. In *Multivariate*  
999 *Kernel Smoothing and its Applications*. Chapman and Hall/CRC.  
1000 <https://doi.org/10.1201/9780429485572>  
1001 Choe, J. C., Choe, J. C., & Crespi, B. J. (1997). *The evolution of social behaviour in insects and*  
1002 *arachnids*. Cambridge University Press.  
1003 Clint, E. K., Sober, E., Garland, T., & Rhodes, J. S. (2012). Male superiority in spatial navigation:  
1004 Adaptation or side effect? *Quarterly Review of Biology*, 87(4), 289–313.  
1005 <https://doi.org/10.1086/668168>  
1006 Clutton-Brock, T. H. (1991). The Evolution of Parental Care. In *The Evolution of Parental Care*.  
1007 Princeton University Press. <https://doi.org/10.1515/9780691206981/HTML>  
1008 Costa, S. S., Andrade, R., Carneiro, L. A., Gonçalves, E. J., Kotrschal, K., & Oliveira, R. F. (2011). Sex  
1009 Differences in the Dorsolateral Telencephalon Correlate with Home Range Size in Blennioid Fish.  
1010 *Brain, Behavior and Evolution*, 77(1), 55–64. <https://doi.org/10.1159/000323668>  
1011 Cribari-Neto F, Zeileis A (2010). “Beta Regression in R.” *Journal of Statistical Software*, 34(2), 1–24.  
1012 doi: 10.18637/jss.v034.i02.  
1013 Dawson, J. L. M., Cheung, Y. M., & Lau, R. T. S. (1975). Developmental effects of neonatal sex  
1014 hormones on spatial and activity skills in the white rat. *Biological Psychology*, 3(3), 213–229.  
1015 [https://doi.org/10.1016/0301-0511\(75\)90036-8](https://doi.org/10.1016/0301-0511(75)90036-8)  
1016 Diego-Rasilla, F. J., Luengo, R. M., & Phillips, J. B. (2005). Magnetic compass mediates nocturnal  
1017 homing by the alpine newt, *Triturus alpestris*. *Behavioral Ecology and Sociobiology*, 58(4), 361–  
1018 365.  
1019 Dole, J. W. (1968). Homing in leopard frogs, *Rana pipiens*. *Ecology*, 49(3), 386–399.  
1020 Donnelly, M. A. (1989). Effects of reproductive resource supplementation on space-use patterns in  
1021 *Dendrobates pumilio*. *Oecologia* 1989 81:2, 81(2), 212–218. <https://doi.org/10.1007/BF00379808>  
1022 Driscoll, I., Hamilton, D. A., Yeo, R. A., Brooks, W. M., & Sutherland, R. J. (2005). Virtual navigation in  
1023 humans: the impact of age, sex, and hormones on place learning. *Hormones and Behavior*, 47(3),  
1024 326–335. <https://doi.org/10.1016/J.YHBEH.2004.11.013>  
1025 Duellman, W. E. (1989). Alternative life-history styles in anuran amphibians: evolutionary and ecological  
1026 implications. In *Alternative life-history styles of animals* (pp. 101–126). Springer.  
1027 Eals, M., & Silverman, I. (1994). The Hunter-Gatherer theory of spatial sex differences: Proximate factors  
1028 mediating the female advantage in recall of object arrays. *Ethology and Sociobiology*, 15(2), 95–  
1029 105. [https://doi.org/10.1016/0162-3095\(94\)90020-5](https://doi.org/10.1016/0162-3095(94)90020-5)  
1030 Ferguson, D. E. (1971). The sensory basis of orientation in amphibians. *Annals of the New York Academy*  
1031 *of Sciences*, 188(1), 30–36. <https://doi.org/10.1111/j.1749-6632.1971.tb13087.x>  
1032 Fischer, E. K., & O’Connell, L. A. (2020). Hormonal and neural correlates of care in active versus  
1033 observing poison frog parents. *Hormones and Behavior*, 120, 104696.  
1034 <https://doi.org/10.1016/J.YHBEH.2020.104696>  
1035 Fischer, M.-T., Ringler, M., Ringler, E., & Pašukonis, A. (2020). Reproductive behavior drives female  
1036 space use in a sedentary Neotropical frog. *PeerJ*, 2020(4), e8920. <https://doi.org/10.7717/peerj.8920>  
1037 Fouilloux, C. A., Serrano Rojas, S. J., Carvajal-Castro, J. D., Valkonen, J. K., Gaucher, P., Fischer, M.-T.,  
1038 Pašukonis, A., & Rojas, B. (2021). Pool choice in a vertical landscape: Tadpole-rearing site  
1039 flexibility in phytotelm-breeding frogs. *Ecology and Evolution*, 11(13).  
1040 <https://doi.org/10.1002/ece3.7741>  
1041 Galea, L. A. M., Kavaliers, M., Ossenkopp, K. P., & Hampson, E. (1995). Gonadal Hormone Levels and  
1042 Spatial Learning Performance in the Morris Water Maze in Male and Female Meadow Voles,  
1043 *Microtus pennsylvanicus*. *Hormones and Behavior*, 29(1), 106–125.  
1044 <https://doi.org/10.1006/HBEH.1995.1008>

- 1045 Galea, L. A. M., Kavaliers, M., Ossenkopp, K. P., Innes, D., & Hargreaves, E. L. (1994). Sexually  
1046 dimorphic spatial learning varies seasonally in two populations of deer mice. *Brain Research*,  
1047 635(1–2), 18–26. [https://doi.org/10.1016/0006-8993\(94\)91419-2](https://doi.org/10.1016/0006-8993(94)91419-2)
- 1048 Gaulin, S. J. C., & FitzGerald, R. W. (1986). Sex Differences in Spatial Ability: An Evolutionary  
1049 Hypothesis and Test. *The American Naturalist*, 127(1), 74–88. <https://doi.org/10.1086/284468>
- 1050 Gaulin, S. J. C., & FitzGerald, R. W. (1989). Sexual selection for spatial-learning ability. *Animal*  
1051 *Behaviour*, 37(2), 322–331. [https://doi.org/10.1016/0003-3472\(89\)90121-8](https://doi.org/10.1016/0003-3472(89)90121-8)
- 1052 Gaulin, S. J. C., FitzGerald, R. W., & Wartell, M. S. (1990). Sex differences in spatial ability and activity  
1053 in two vole species (*Microtus ochrogaster* and *M. pennsylvanicus*). *Journal of Comparative*  
1054 *Psychology*, 104(1), 88–93. <https://doi.org/10.1037/0735-7036.104.1.88>
- 1055 Grant, D., Anderson, O., & Twitty, V. (1968). Homing orientation by olfaction in newts (*Taricha*  
1056 *rivularis*). *Science*, 160(3834), 1354–1356. <https://doi.org/10.1126/science.160.3834.1354>
- 1057 Grant, T., Frost, D. R., Caldwell, J. P., Gagliardo, R. O. N., Haddad, C. F. B., Kok, P. J. R., Means, D. B.,  
1058 Noonan, B. P., Schargel, W. E., & Wheeler, W. C. (2006). Phylogenetic systematics of dart-poison  
1059 frogs and their relatives (Amphibia: Athesphatanura: Dendrobatidae). *Bulletin of the American*  
1060 *Museum of Natural History*, 2006(299), 1–262. [https://doi.org/10.1206/0003-0090\(2006\)299\[1:PSODFA\]2.0.CO;2](https://doi.org/10.1206/0003-0090(2006)299[1:PSODFA]2.0.CO;2)
- 1061
- 1062 Gray, J. A., & Buffery, A. W. H. (1971). Sex differences in emotional and cognitive behaviour in  
1063 mammals including man: Adaptive and neural bases. *Acta Psychologica*, 35(2), 89–111.  
1064 [https://doi.org/10.1016/0001-6918\(71\)90014-X](https://doi.org/10.1016/0001-6918(71)90014-X)
- 1065 Greenwood, P. J. (1980). Mating systems, philopatry and dispersal in birds and mammals. *Animal*  
1066 *Behaviour*, 28(4), 1140–1162. [https://doi.org/10.1016/S0003-3472\(80\)80103-5](https://doi.org/10.1016/S0003-3472(80)80103-5)
- 1067 Gross, M. R., & Sargent, R. C. (1985). The Evolution of Male and Female Parental Care in Fishes.  
1068 *Integrative and Comparative Biology*, 25(3), 807–822. <https://doi.org/10.1093/ICB/25.3.807>
- 1069 Guigueno, M. F., Snow, D. A., MacDougall-Shackleton, S. A., & Sherry, D. F. (2014). Female cowbirds  
1070 have more accurate spatial memory than males. *Biology Letters*, 10(2).  
1071 <https://doi.org/10.1098/RSBL.2014.0026>
- 1072 Harris, S., Ramnarine, I. W., Smith, H. G., & Pettersson, L. B. (2010). Picking personalities apart:  
1073 estimating the influence of predation, sex and body size on boldness in the guppy *Poecilia*  
1074 *reticulata*. *Oikos*, 119(11), 1711–1718. <https://doi.org/10.1111/J.1600-0706.2010.18028.X>
- 1075 Helfman, G., Collette, B. B., Facey, D. E., & Bowen, B. W. (2009). *The diversity of fishes: biology,*  
1076 *evolution, and ecology*. John Wiley & Sons.
- 1077 Isgor, C., & Sengelaub, D. R. (1998). Prenatal Gonadal Steroids Affect Adult Spatial Behavior, CA1 and  
1078 CA3 Pyramidal Cell Morphology in Rats. *Hormones and Behavior*, 34(2), 183–198.  
1079 <https://doi.org/10.1006/HBEH.1998.1477>
- 1080 Joly, P., & Miaud, C. (1989). Fidelity to the breeding site in the alpine newt *Triturus alpestris*.  
1081 *Behavioural Processes*, 19(1–3), 47–56. [https://doi.org/10.1016/0376-6357\(89\)90030-2](https://doi.org/10.1016/0376-6357(89)90030-2)
- 1082 Jonasson, Z. (2005). Meta-analysis of sex differences in rodent models of learning and memory: a review  
1083 of behavioral and biological data. *Neuroscience & Biobehavioral Reviews*, 28(8), 811–825.  
1084 <https://doi.org/10.1016/J.NEUBIOREV.2004.10.006>
- 1085 Jones, C. M., Braithwaite, V. A., & Healy, S. D. (2003). The evolution of sex differences in spatial  
1086 ability. *Behavioral Neuroscience*, 117(3), 403. <https://doi.org/10.1037/0735-7044.117.3.403>
- 1087 Joseph, R., Hess, S., & Birecree, E. (1978). Effects of hormone manipulations and exploration on sex  
1088 differences in maze learning. *Behavioral Biology*, 24(3), 364–377. [https://doi.org/10.1016/S0091-6773\(79\)90223-2](https://doi.org/10.1016/S0091-6773(79)90223-2)
- 1089
- 1090 King, A. J., Fürtbauer, I., Mamuneas, D., James, C., & Manica, A. (2013). Sex-Differences and Temporal  
1091 Consistency in Stickleback Fish Boldness. *PLOS ONE*, 8(12), e81116.  
1092 <https://doi.org/10.1371/JOURNAL.PONE.0081116>
- 1093 Kölliker, M., Royle, N. J., Smiseth, P. T., & Royle, N. J. (2012). The evolution of parental care. *The*  
1094 *Princeton Guide to Evolution*, 663.

- 1095 Lampert, K. P., Rand, A. S., Mueller, U. G., & Ryan, M. J. (2003). Fine-scale genetic pattern and  
1096 evidence for sex-biased dispersal in the túngara frog, *Physalaemus pustulosus*. *Molecular Ecology*,  
1097 12(12), 3325–3334. <https://doi.org/10.1046/J.1365-294X.2003.02016.X>
- 1098 Lenth, R., Buerkner, P., Herve, M., Love, J., Miguez, F., Riebl, H., Singmann, H. (2022). *Estimated*  
1099 *Marginal Means, aka Least-Squares Means (Package emmeans: version 1.7.4-1)*.
- 1100 Li, X. Y., & Kokko, H. (2019). Sex-biased dispersal: a review of the theory. *Biological Reviews*, 94(2),  
1101 721–736. <https://doi.org/10.1111/BRV.12475>
- 1102 Liu, Y., & Burmeister, S. S. (2017). Sex differences during place learning in the túngara frog. *Animal*  
1103 *Behaviour*, 128, 61–67. <https://doi.org/10.1016/J.ANBEHAV.2017.04.002>
- 1104 Liu, Y., Day, L. B., Summers, K., & Burmeister, S. S. (2016). Learning to learn: Advanced behavioural  
1105 flexibility in a poison frog. *Animal Behaviour*, 111. <https://doi.org/10.1016/j.anbehav.2015.10.018>
- 1106 Liu, Y., Day, L. B., Summers, K., & Burmeister, S. S. (2019). A cognitive map in a poison frog. *Journal*  
1107 *of Experimental Biology*, 222(11). <https://doi.org/10.1242/JEB.197467/20454>
- 1108 Lüdtke, D. (2021). *sjPlot: Data Visualization for Statistics in Social Science* (R package version 2.8.10).  
1109 <https://CRAN.R-project.org/package=sjPlot>.
- 1110 Mabry, K. E., Shelley, E. L., Davis, K. E., Blumstein, D. T., & van Vuren, D. H. (2013). Social Mating  
1111 System and Sex-Biased Dispersal in Mammals and Birds: A Phylogenetic Analysis. *PLOS ONE*,  
1112 8(3), e57980. <https://doi.org/10.1371/JOURNAL.PONE.0057980>
- 1113 McNaughton, B. L., Battaglia, F. P., Jensen, O., Moser, E. I., & Moser, M. B. (2006). Path integration and  
1114 the neural basis of the “cognitive map.” *Nature Reviews Neuroscience* 2006 7:8, 7(8), 663–678.  
1115 <https://doi.org/10.1038/nrn1932>
- 1116 McVey, M. E., Zahary, R. G., Perry, D., & MacDougall, J. (1981). Territoriality and Homing Behavior in  
1117 the Poison Dart Frog (*Dendrobates pumilio*). *Copeia*, 1981(1), 1. <https://doi.org/10.2307/1444035>
- 1118 Murasaki, S. (2010). Sex-Specific Patterns of Movement and Space Use in the Strawberry Poison Frog,  
1119 *Oophaga pumilio*. *FIU Electronic Theses and Dissertations*.  
1120 <https://doi.org/10.25148/etd.FI10080418>
- 1121 Mysterud, A., Pérez-Barbería, F. J., & Gordon, I. J. (2001). The effect of season, sex and feeding style on  
1122 home range area versus body mass scaling in temperate ruminants. *Oecologia* 2000 127:1, 127(1),  
1123 30–39. <https://doi.org/10.1007/S004420000562>
- 1124 Navarro-Salcedo, P., Arcila-Pérez, L. F., Pérez-González, J. L., Rueda-Solano, L. A., Rada, M., &  
1125 Vargas-Salinas, F. (2022). Sex difference in homing: males but not females return home despite  
1126 offspring mortality in *Ikakogi tayrona*, a glassfrog with prolonged maternal care. *Behavioral*  
1127 *Ecology and Sociobiology*, 76(1), 1–13. <https://doi.org/10.1007/S00265-021-03107-Z/FIGURES/4>
- 1128 Navarro-Salcedo, P., Duarte-Marín, S., Rada, M., & Vargas-Salinas, F. (2021). Parental status is related  
1129 to homing motivation in males of the glassfrog *Centrolene savagei*. *Ethology Ecology and*  
1130 *Evolution*, 33(5), 528–542. <https://doi.org/10.1080/03949370.2020.1870569>
- 1131 Neave, N., Menaged, M., & Weightman, D. R. (1999). Sex Differences in Cognition: The Role of  
1132 Testosterone and Sexual Orientation. *Brain and Cognition*, 41(3), 245–262.  
1133 <https://doi.org/10.1006/BRCG.1999.1125>
- 1134 Ofstad, E. G., Herfindal, I., Solberg, E. J., & Sæther, B. E. (2016). Home ranges, habitat and body mass:  
1135 simple correlates of home range size in ungulates. *Proceedings of the Royal Society B: Biological*  
1136 *Sciences*, 283(1845). <https://doi.org/10.1098/RSPB.2016.1234>
- 1137 Ogurtsov, S. v., Antipov, V. A., & Permyakov, M. G. (2018). Sex differences in exploratory behaviour of  
1138 the common toad, *Bufo bufo*. *Ethology Ecology & Evolution*, 30(6), 543–568.  
1139 <https://doi.org/10.1080/03949370.2018.1459864>
- 1140 O’keefe, J., & Nadel, L. (1978). *The hippocampus as a cognitive map*. Oxford university press.
- 1141 Pašukonis, A., Loretto, M.-C., & Hodl, W. (2018). Map-like navigation from distances exceeding routine  
1142 movements in the three-striped poison frog (*Ameerega trivittata*). *Journal of Experimental Biology*,  
1143 221(2), jeb169714. <https://doi.org/10.1242/jeb.169714>



- 1144 Pašukonis, A., Loretto, M.-C., & Rojas, B. (2019). How far do tadpoles travel in the rainforest? Parent-  
1145 assisted dispersal in poison frogs. *Evolutionary Ecology*, 33(4), 613–623.  
1146 <https://doi.org/10.1007/s10682-019-09994-z>
- 1147 Pašukonis, A., Trenkwalder, K., Ringler, M., Ringler, E., Mangione, R., Steininger, J., Warrington, I., &  
1148 Hödl, W. (2016). The significance of spatial memory for water finding in a tadpole-transporting  
1149 frog. *Animal Behaviour*, 116, 89–98. <https://doi.org/10.1016/j.anbehav.2016.02.023>
- 1150 Pašukonis, A., Warrington, I., Ringler, M., & Hödl, W. (2014). Poison frogs rely on experience to find the  
1151 way home in the rainforest. *Biology Letters*, 10(11), 20140642.  
1152 <https://doi.org/10.1098/rsbl.2014.0642>
- 1153 Perry, G., & Garland Jr, T. (2002). Lizard home ranges revisited: effects of sex, body size, diet, habitat,  
1154 and phylogeny. *Ecology*, 83(7), 1870–1885. <https://doi.org/10.2307/3071771>
- 1155 Phillips, J. B., Adler, K., & Borland, S. C. (1995). True navigation by an amphibian. *Animal Behaviour*,  
1156 50(3), 855–858.
- 1157 Pichler, C., Weinlein, S., Kopeinig, L., & Pašukonis, A. (2017). Homing performance in a territorial  
1158 dendrobatid frog, *Allobates talamancae*. *Salamandra*, 53(2), 309–313.
- 1159 Pough, F. H., & Taigen, T. L. (1990). Metabolic correlates of the foraging and social behaviour of dart-  
1160 poison frogs. *Animal Behaviour*, 39(1), 145–155. [https://doi.org/10.1016/S0003-3472\(05\)80734-1](https://doi.org/10.1016/S0003-3472(05)80734-1)
- 1161 QGIS.org. (2022). *QGIS Geographic Information System*. QGIS Geographic Information System.  
1162 <https://www.qgis.org>
- 1163 RStudio Team (2020). RStudio: Integrated Development for R. RStudio, PBC, Boston, MA URL  
1164 <http://www.rstudio.com/>
- 1165 R Core Team (2020). R: A language and environment for statistical computing. R Foundation for  
1166 Statistical Computing, Vienna, Austria. URL <https://www.R-project.org/>.
- 1167 Ringler, E., Barbara Beck, K., Weinlein, S., Huber, L., & Ringler, M. (2017). Adopt, ignore, or kill? Male  
1168 poison frogs adjust parental decisions according to their territorial status. *Scientific Reports*, 7.  
1169 <https://doi.org/10.1038/srep43544>
- 1170 Ringler, E., Mangione, R., & Ringler, M. (2015). Where have all the tadpoles gone? Individual genetic  
1171 tracking of amphibian larvae until adulthood. *Molecular Ecology Resources*, 15(4), 737–746.  
1172 <https://doi.org/10.1111/1755-0998.12345>
- 1173 Ringler, E., Pašukonis, A., Fitch, W. T., Huber, L., Hödl, W., & Ringler, M. (2015). Flexible  
1174 compensation of uniparental care: female poison frogs take over when males disappear. *Behavioral*  
1175 *Ecology*, 26(4), 1219–1225. <https://doi.org/10.1093/beheco/arv069>
- 1176 Ringler, E., Pašukonis, A., Hödl, W., & Ringler, M. (2013). Tadpole transport logistics in a Neotropical  
1177 poison frog: indications for strategic planning and adaptive plasticity in anuran parental care.  
1178 *Frontiers in Zoology*, 10(1), 1–10. <https://doi.org/10.1186/1742-9994-10-67>
- 1179 Ringler, E., Pašukonis, A., Ringler, M., & Huber, L. (2016). Sex-specific offspring discrimination reflects  
1180 respective risks and costs of misdirected care in a poison frog. *Animal Behaviour*, 114, 173–179.  
1181 <https://doi.org/10.1016/j.anbehav.2016.02.008>
- 1182 Ringler, E., Ringler, M., Jehle, R., & Hödl, W. (2012). The Female Perspective of Mating in *A. femoralis*,  
1183 a Territorial Frog with Paternal Care – A Spatial and Genetic Analysis. *PLOS ONE*, 7(6), e40237.  
1184 <https://doi.org/10.1371/journal.pone.0040237>
- 1185 Ringler, E., Szipl, G., Harrigan, R. J., Bartl-Binder, P., Mangione, R., & Ringler, M. (2018). Hierarchical  
1186 decision-making balances current and future reproductive success. *Molecular Ecology*, 27(9), 2289–  
1187 2301. <https://doi.org/10.1111/mec.14583>
- 1188 Ringler, M., Mangione, R., Pašukonis, A., Rainer, G., Gyimesi, K., Felling, J., Kronaus, H., Réjou-  
1189 Méchain, M., Chave, J., & Reiter, K. (2016). High-resolution forest mapping for behavioural studies  
1190 in the Nature Reserve ‘Les Nouragues’, French Guiana. *Journal of Maps*, 12(1), 26–32.  
1191 <https://doi.org/10.1080/17445647.2014.972995>
- 1192 Ringler, M., Ursprung, E., & Hödl, W. (2009). Site fidelity and patterns of short- and long-term  
1193 movement in the brilliant-thighed poison frog *Allobates femoralis* (Aromobatidae). *Behavioral*  
1194 *Ecology and Sociobiology*, 63(9), 1281–1293. <https://doi.org/10.1007/s00265-009-0793-7>

- 1195 Rodríguez, C., Amézquita, A., Ringler, M., Pašukonis, A., & Hödl, W. (2020). Calling amplitude  
1196 flexibility and acoustic spacing in the territorial frog *Allobates femoralis*. *Behavioral Ecology and*  
1197 *Sociobiology*, 74(6), 1–10. <https://doi.org/10.1007/s00265-020-02857-6>
- 1198 Rodríguez, C., Fusani, L., Raboisson, G., Hödl, W., Ringler, E., & Canoine, V. (2022). Androgen  
1199 responsiveness to simulated territorial intrusions in *Allobates femoralis* males: Evidence supporting  
1200 the challenge hypothesis in a territorial frog. *General and Comparative Endocrinology*, 114046.  
1201 <https://doi.org/10.1016/j.ygcen.2022.114046>
- 1202 Roithmair, M. E. (1992). Territoriality and male mating success in the dart-poison frog, *Epipedobates*  
1203 *femoralis* (Dendrobatidae, Anura). *Ethology*, 92(4), 331–343. <https://doi.org/10.1111/j.1439-0310.1992.tb00970.x>
- 1205 Rojas, B. (2014). Strange parental decisions: Fathers of the dyeing poison frog deposit their tadpoles in  
1206 pools occupied by large cannibals. *Behavioral Ecology and Sociobiology*, 68(4).  
1207 <https://doi.org/10.1007/s00265-013-1670-y>
- 1208 Rojas, B. (2015). Mind the gap: Treefalls as drivers of parental trade-offs. *Ecology and Evolution*, 5(18).  
1209 <https://doi.org/10.1002/ece3.1648>
- 1210 Rojas, B., & Pašukonis, A. (2019). From habitat use to social behavior: Natural history of a voiceless  
1211 poison frog, *Dendrobates tinctorius*. *PeerJ*, 2019(9), e7648. <https://doi.org/10.7717/peerj.7648>
- 1212 Roof, R. L., & Havens, M. D. (1992). Testosterone improves maze performance and induces development  
1213 of a male hippocampus in females. *Brain Research*, 572(1–2), 310–313.  
1214 [https://doi.org/10.1016/0006-8993\(92\)90491-Q](https://doi.org/10.1016/0006-8993(92)90491-Q)
- 1215 Santos, J. C., & Cannatella, D. C. (2011). Phenotypic integration emerges from aposematism and scale in  
1216 poison frogs. *Proceedings of the National Academy of Sciences of the United States of America*,  
1217 108(15), 6175–6180. <https://doi.org/10.1073/pnas.1010952108>
- 1218 Santos, J. C., Tarvin, R. D., & O’Connell, L. A. (2016). A Review of Chemical Defense in Poison Frogs  
1219 (Dendrobatidae): Ecology, Pharmacokinetics, and Autoresistance. *Chemical Signals in Vertebrates*  
1220 13, 305–337. [https://doi.org/10.1007/978-3-319-22026-0\\_21](https://doi.org/10.1007/978-3-319-22026-0_21)
- 1221 Sawrey, D. K., Keith, J. R., & Backes, R. C. (1994). Place learning by three vole species (*Microtus*  
1222 *ochrogaster*, *M. montanus*, and *M. pennsylvanicus*) in the Morris swim task. *Journal of*  
1223 *Comparative Psychology (Washington, D.C. : 1983)*, 108(2), 179–188.  
1224 <https://doi.org/10.1037/0735-7036.108.2.179>
- 1225 Schuett, W., & Dall, S. R. X. (2009). Sex differences, social context and personality in zebra finches,  
1226 *Taeniopygia guttata*. *Animal Behaviour*, 77(5), 1041–1050.  
1227 <https://doi.org/10.1016/J.ANBEHAV.2008.12.024>
- 1228 Schuett, W., Tregenza, T., & Dall, S. R. X. (2010). Sexual selection and animal personality. *Biological*  
1229 *Reviews*, 85(2), 217–246. <https://doi.org/10.1111/J.1469-185X.2009.00101.X>
- 1230 Schulte, L. M., Ringler, E., Rojas, B., & Stynoski, J. L. (2020). Developments in Amphibian Parental  
1231 Care Research: History, Present Advances, and Future Perspectives. *Herpetological Monographs*,  
1232 34(1), 71–97. <https://doi.org/10.1655/HERPMONOGRAPHS-D-19-00002.1>
- 1233 Schulz, K., & Korz, V. (2010). Hippocampal testosterone relates to reference memory performance and  
1234 synaptic plasticity in male rats. *Frontiers in Behavioral Neuroscience*, 4, 187.  
1235 <https://doi.org/10.3389/FNBEH.2010.00187/BIBTEX>
- 1236 Shaykevich, D. A., Pašukonis, A., & O’Connell, L. A. (2021). Long distance homing in the cane toad  
1237 (*Rhinella marina*) in its native range. *Journal of Experimental Biology*, 225(2), jeb243048.  
1238 <https://doi.org/10.1242/JEB.243048>
- 1239 Sherry, D. F., Forbes, M. R. L., Khurgel, M., & Ivy, G. O. (1993). Females have a larger hippocampus  
1240 than males in the brood-parasitic brown-headed cowbird. *Proceedings of the National Academy of*  
1241 *Sciences of the United States of America*, 90(16), 7839–7843.  
1242 <https://doi.org/10.1073/PNAS.90.16.7839>
- 1243 Sherry, D. F., & Hampson, E. (1997). Evolution and the hormonal control of sexually-dimorphic spatial  
1244 abilities in humans. *Trends in Cognitive Sciences*, 1(2), 50–56. [https://doi.org/10.1016/S1364-6613\(97\)01015-2](https://doi.org/10.1016/S1364-6613(97)01015-2)
- 1245

- 1246 Silverman, I., Choi, J., & Peters, M. (2007). The Hunter-gatherer theory of sex differences in spatial  
1247 abilities: Data from 40 countries. *Archives of Sexual Behavior*, 36(2), 261–268.  
1248 <https://doi.org/10.1007/s10508-006-9168-6>
- 1249 Silverstone, P. A. (1973). Observations on the behavior and ecology of a Colombian poison-arrow frog,  
1250 the Kōkoé-Pá (*Dendrobates histrionicus* Berthold). *Herpetologica*, 295–301.
- 1251 Silverstone, P. A. (1975). A revision of the poison-arrow frogs of the genus *Dendrobates* Wagler. *Natural*  
1252 *History*, 21, 1–55.
- 1253 Silverstone, P. A. (1976). A revision of the poison-arrow frogs of the genus *Phyllobates* Bibron in Sagra  
1254 (Family Dendrobatidae). *Natural History*, 27, 1–53.
- 1255 Sinsch, U. (1987). Orientation behaviour of toads (*Bufo bufo*) displaced from the breeding site. *Journal of*  
1256 *Comparative Physiology A*, 161(5), 715–727. <https://doi.org/10.1007/BF00605013>
- 1257 Sinsch, U. (1990). Migration and orientation in anuran amphibians. *Ethology Ecology and Evolution*,  
1258 2(1), 65–79. <https://doi.org/10.1080/08927014.1990.9525494>
- 1259 Sinsch, U. (1992). Sex-biased site fidelity and orientation behaviour in reproductive natterjack toads  
1260 (*Bufo calamita*). *Ethology Ecology and Evolution*, 4(1), 15–32.  
1261 <https://doi.org/10.1080/08927014.1992.9525347>
- 1262 Sinsch, U. (2006). Orientation and navigation in Amphibia. *Marine and Freshwater Behaviour and*  
1263 *Physiology*, 39(1), 65–71. <https://doi.org/10.1080/10236240600562794>
- 1264 Sinsch, U. (2007). Initial orientation of newts (*Triturus vulgaris*, *T. cristatus*) following short- and long-  
1265 distance displacements. *Ethology Ecology & Evolution*, 19(3), 201–214.
- 1266 Sinsch, U. (2014). Movement ecology of amphibians: from individual migratory behaviour to spatially  
1267 structured populations in heterogeneous landscapes. *J. Zool*, 92, 491–502.  
1268 <https://doi.org/10.1139/cjz-2013-0028>
- 1269 Speed, M. P., Brockhurst, M. A., & Ruxton, G. D. (2010). The dual benefits of aposematism: predator  
1270 avoidance and enhanced resource collection. *Evolution*, 64(6), 1622–1633.  
1271 <https://doi.org/10.1111/J.1558-5646.2009.00931.X>
- 1272 Stewart, J., Skvarenina, A., & Pottier, J. (1975). Effects of neonatal androgens on open-field behavior and  
1273 maze learning in the prepubescent and adult rat. *Physiology & Behavior*, 14(3), 291–295.  
1274 [https://doi.org/10.1016/0031-9384\(75\)90036-0](https://doi.org/10.1016/0031-9384(75)90036-0)
- 1275 Stynoski, J. L. (2009). Discrimination of offspring by indirect recognition in an egg-feeding dendrobatid  
1276 frog, *Oophaga pumilio*. *Animal Behaviour*, 78(6), 1351–1356.  
1277 <https://doi.org/10.1016/J.ANBEHAV.2009.09.002>
- 1278 Summers, K. (1992). Mating strategies in two species of dart-poison frogs: a comparative study. *Animal*  
1279 *Behaviour*, 43(6), 907–919. [https://doi.org/10.1016/S0003-3472\(06\)80004-7](https://doi.org/10.1016/S0003-3472(06)80004-7)
- 1280 Summers, K. (2019). Metabolism and parental care in ectotherms: a comment on Beekman et al.  
1281 *Behavioral Ecology*, 30(3), 593–594. <https://doi.org/10.1093/BEHECO/ARZ038>
- 1282 Summers, K., & Tumulty, J. (2014). Parental care, sexual selection, and mating systems in neotropical  
1283 poison frogs. In *Sexual selection* (pp. 289–320). Academic Press.
- 1284 Toft, C. A. (1981). Feeding ecology of Panamanian litter anurans: patterns in diet and foraging mode.  
1285 *Journal of Herpetology*, 15(2), 139–144. <https://doi.org/10.2307/1563372>
- 1286 Trivers, R. (1972). Parental investment and sexual selection. *Sexual Selection & the Descent of Man*,  
1287 *Aldine de Gruyter, New York*, 136–179.
- 1288 Tukey, J. W. (1977). *Exploratory data analysis* (Vol. 2, pp. 131-160).
- 1289 Twitty, V., Grant, D., & Anderson, O. (1964). Long distance homing in the newt *Taricha rivularis*.  
1290 *Proceedings of the National Academy of Sciences of the United States of America*, 51(1), 51.  
1291 <https://doi.org/10.1073/pnas.51.1.51>
- 1292 van Goozen, S. H. M., Cohen-Kettenis, P. T., Gooren, L. J. G., Frijda, N. H., & van de Poll, N. E. (1995).  
1293 Gender differences in behaviour: Activating effects of cross-sex hormones.  
1294 *Psychoneuroendocrinology*, 20(4), 343–363. [https://doi.org/10.1016/0306-4530\(94\)00076-X](https://doi.org/10.1016/0306-4530(94)00076-X)
- 1295 Ventura, R. E., Liu, Y., & Burmeister, S. S. (2019). Reconsidering sex differences during place learning  
1296 in túngara frogs. *Current Zoology*, 65(3), 317–321. <https://doi.org/10.1093/CZ/ZOZ031>



- 1297 Videlier, M., Cornette, R., Bonneaud, C., & Herrel, A. (2015). Sexual differences in exploration behavior  
1298 in *Xenopus tropicalis*? *The Journal of Experimental Biology*, 218(11), 1733–1739.
- 1299 Wells, K. D. (1977). The social behaviour of anuran amphibians. *Animal Behaviour*, 25, 666–693.  
1300 [https://doi.org/10.1016/0003-3472\(77\)90118-X](https://doi.org/10.1016/0003-3472(77)90118-X)
- 1301 Wells, K. D. (2010). *The ecology and behavior of amphibians*. University of Chicago Press.
- 1302 Weygoldt, P. (1987). Evolution of parental care in dart poison frogs (Amphibia: Anura: Dendrobatidae).  
1303 *Journal of Zoological Systematics and Evolutionary Research*, 25(1), 51–67.  
1304 <https://doi.org/10.1111/j.1439-0469.1987.tb00913.x>
- 1305 Wickham H (2016). *ggplot2: Elegant Graphics for Data Analysis*. Springer-Verlag New York. ISBN  
1306 978-3-319-24277-4, <https://ggplot2.tidyverse.org>.
- 1307 Williams, C. L., Barnett, A. M., & Meck, W. H. (1990). Organizational Effects of Early Gonadal  
1308 Secretions on Sexual Differentiation in Spatial Memory. *Behavioral Neuroscience*, 104(1), 84–97.  
1309 <https://doi.org/10.1037/0735-7044.104.1.84>
- 1310 Zamudio, K. R., Bell, R. C., Nali, R. C., Haddad, C. F. B., & Prado, C. P. A. (2016). Polyandry,  
1311 predation, and the evolution of frog reproductive modes. *American Naturalist*, 188(S1), S41–S61.  
1312 <https://doi.org/10.1086/687547>
- 1313 Zimmermann, H., & Zimmermann, E. (1981). Sozialverhalten, Fortpflanzungsverhalten und Zucht der  
1314 Färberfrösche *Dendrobates histrionicus* und *D. lehmanni* sowie einiger anderer Dendrobatiden.  
1315 *Zeitschrift Des Kölner Zoo*, 24(3), 83–99.
- 1316
- 1317
